# Supplementary material
Source: ML conference proceedings conference paper supplement (https://proceedings.mlr.press/v97/huang19a.html)
Supplement: Supplementary file [file huang19a-supp.pdf]

---

# Supplementary Materials for “Faster Stochastic Alternating Direction Method of Multipliers for Nonconvex Optimization”

---

Feihu Huang<sup>1</sup> Songcan Chen<sup>2,3</sup> Heng Huang<sup>1,4</sup>

## 1. Preliminaries

In this section, we give some preliminaries for the following theoretical analysis.

In this paper, we focus on the following nonconvex nonsmooth problem:

$$\begin{aligned} \min_{x, \{y_j\}_{j=1}^m} f(x) &:= \begin{cases} \frac{1}{n} \sum_{i=1}^n f_i(x) \text{ (finite-sum)} \\ \mathbb{E}_{\zeta}[f(x, \zeta)] \text{ (online)} \end{cases} + \sum_{j=1}^m g_j(y_j) \\ \text{s.t. } Ax + \sum_{j=1}^m B_j y_j &= c, \end{aligned} \quad (1)$$

Next, we give some standard assumptions regarding problem (1) as follows:

**Assumption 1.** Each loss function  $f_i(x)$  is  $L$ -smooth such that

$$\|\nabla f_i(x) - \nabla f_i(y)\| \leq L\|x - y\|, \quad \forall x, y \in \mathbb{R}^d,$$

which is equivalent to

$$f_i(x) \leq f_i(y) + \nabla f_i(y)^T(x - y) + \frac{L}{2}\|x - y\|^2.$$

**Assumption 2.** Gradient of each loss function  $f_i(x)$  is bounded, i.e., there exists a constant  $\delta > 0$  such that for all  $x$ , it follows  $\|\nabla f_i(x)\|^2 \leq \delta^2$ .

**Assumption 3.**  $f(x)$  and  $g_j(y_j)$  for all  $j \in [m]$  are all lower bounded, and let  $f^* = \inf_x f(x) > -\infty$  and  $g_j^* = \inf_{y_j} g_j(y_j) > -\infty$ .

**Assumption 4.**  $A$  is a full row or column rank matrix.

**Definition 1.** Given  $\epsilon > 0$ , the point  $(x^*, y_{[m]}^*, z^*)$  is said to be an  $\epsilon$ -stationary point of the problem (1), if it holds that

$$\mathbb{E}[\text{dist}(0, \partial L(x^*, y_{[m]}^*, z^*))^2] \leq \epsilon, \quad (2)$$

---

<sup>1</sup>Department of Electrical & Computer Engineering, University of Pittsburgh, PA 15261, USA <sup>2</sup>College of Computer Science & Technology, Nanjing University of Aeronautics and Astronautics, Nanjing 211106, China <sup>3</sup>MIT Key Laboratory of Pattern Analysis & Machine Intelligence <sup>4</sup>JD Finance America Corporation. Correspondence to: Heng Huang <heng.huang@pitt.edu>.

where  $L(x, y_{[m]}, z) = f(x) + \sum_{j=1}^m g_j(y_j) - \langle z, Ax + \sum_{j=1}^m B_j y_j - c \rangle$ ,

$$\partial L(x, y_{[m]}, z) = \begin{bmatrix} \nabla_x L(x, y_{[m]}, z) \\ \partial_{y_1} L(x, y_{[m]}, z) \\ \dots \\ \partial_{y_m} L(x, y_{[m]}, z) \\ -Ax - \sum_{j=1}^m B_j y_j + c \end{bmatrix},$$

and  $\text{dist}(0, \partial L) = \min_{L' \in \partial L} \|0 - L'\|$ .

**Notations:**

- $\|\cdot\|$  denotes the vector  $\ell_2$  norm and the matrix spectral norm, respectively.
- $\|x\|_G = \sqrt{x^T G x}$ , where  $G$  is a positive definite matrix.
- $\sigma_{\min}^A$  and  $\sigma_{\max}^A$  denote the minimum and maximum eigenvalues of  $A^T A$ , respectively.
- $\sigma_{\max}^{B_j}$  denotes the maximum eigenvalues of  $B_j^T B_j$  for all  $j \in [k]$ , and  $\sigma_{\max}^B = \max_{j=1}^k \sigma_{\max}^{B_j}$ .
- $\sigma_{\min}(H_j)$  and  $\sigma_{\max}(H_j)$  denote the minimum and maximum eigenvalues of matrix  $H_j$  for all  $j \in [m]$ , respectively;  $\sigma_{\min}(H) = \min_{j \in [m]} \sigma_{\min}(H_j)$  and  $\sigma_{\max}(H) = \max_{j \in [m]} \sigma_{\max}(H_j)$ .
- $\sigma_{\min}(G)$  and  $\sigma_{\max}(G)$  denotes the minimum and maximum eigenvalues of matrix  $G$ , respectively; the conditional number  $\kappa_G = \frac{\sigma_{\max}(G)}{\sigma_{\min}(G)}$ .
- $\eta$  denotes the step size of updating variable  $x$ .
- $L$  denotes the Lipschitz constant of  $\nabla f(x)$ .
- $b$  denotes the mini-batch size of stochastic gradient.
- In both SPIDER-ADMM and online SPIDER-ADMM,  $K$  denotes the total number of iteration. In both SVRG-ADMM and SAGA-ADMM,  $T$ ,  $M$  and  $S$  are the total number of iterations, the number of iterations in the inner loop, and the number of iterations in the outer loop, respectively.
- In the SVRG-ADMM algorithm,  $y_j^{s,t}$  denotes output of the variable  $y_j$  in  $t$ -th inner loop and  $s$ -th outer loop.

## 2. Theoretical Analysis

In this section, we at detail provide the theoretical analysis of the SPIDER-ADMM, online SPIDER-ADMM, nonconvex SVRG-ADMM and SAGA-ADMM. First, we introduce an useful lemma from Fang et al. (2018). Throughout the paper, let  $n_k = \lceil k/q \rceil$  such that  $(n_k - 1)q \leq k \leq n_k q - 1$ .

**Lemma 1.** (Fang et al., 2018) *Under Assumption 1, the SPIDER generates stochastic gradient  $v_k$  satisfies for all  $(n_k - 1)q + 1 \leq k \leq n_k q - 1$ ,*

$$\mathbb{E}\|v_k - \nabla f(x_k)\|^2 \leq \frac{L^2}{|S_2|} \mathbb{E}\|x_k - x_{k-1}\|^2 + \mathbb{E}\|v_{k-1} - \nabla f(x_{k-1})\|^2. \quad (3)$$

From the above Lemma, telescoping (3) over  $i$  from  $(n_k - 1)q + 1$  to  $k$ , we have

$$\mathbb{E}\|v_k - \nabla f(x_k)\|^2 \leq \sum_{i=(n_k-1)q}^{k-1} \frac{L^2}{|S_2|} \mathbb{E}\|x_{i+1} - x_i\|^2 + \mathbb{E}\|v_{(n_k-1)q} - \nabla f(x_{(n_k-1)q})\|^2. \quad (4)$$

In Algorithm 1, due to  $v_{(n_k-1)q} = \nabla f(x_{(n_k-1)q})$  and  $|S_2| = b$ , we have

$$\mathbb{E}\|v_k - \nabla f(x_k)\|^2 \leq \sum_{i=(n_k-1)q}^{k-1} \frac{L^2}{b} \mathbb{E}\|x_{i+1} - x_i\|^2. \quad (5)$$

In Algorithm 2, using Assumption 2 and  $|S_2| = b_2$ , we obtain

$$\mathbb{E}\|v_k - \nabla f(x_k)\|^2 \leq \sum_{i=(n_k-1)q}^{k-1} \frac{L^2}{b_2} \mathbb{E}\|x_{i+1} - x_i\|^2 + \frac{4\delta^2}{b_1}. \quad (6)$$

### 2.1. Convergence Analysis of the SPIDER-ADMM Algorithm

In this subsection, we conduct convergence analysis of the SPIDER-ADMM. We begin with giving some useful lemmas.

---

#### Algorithm 1 SPIDER-ADMM Algorithm

---

- 1: **Input:**  $b, q, K, \eta > 0$  and  $\rho > 0$ ;
- 2: **Initialize:**  $x_0 \in \mathbb{R}^d, y_j^0 \in \mathbb{R}^p, j \in [m]$  and  $z_0 \in \mathbb{R}^l$ ;
- 3: **for**  $k = 0, 1, \dots, K - 1$  **do**
- 4:   **if**  $\text{mod}(k, q) = 0$  **then**
- 5:     Compute  $v_k = \nabla f(x_k)$ ;
- 6:   **else**
- 7:     Uniformly randomly pick a mini-batch  $\mathcal{I}_k$  (with replacement) from  $\{1, 2, \dots, n\}$  with  $|\mathcal{I}_k| = b$ , and compute

$$v_k = \nabla f_{\mathcal{I}_k}(x_k) - \nabla f_{\mathcal{I}_k}(x_{k-1}) + v_{k-1};$$

- 8:   **end if**
  - 9:    $y_j^{k+1} = \arg \min_{y_j} \{ \mathcal{L}_\rho(x_k, y_{[j-1]}^{k+1}, y_j, y_{[j+1:m]}^k, z_k) + \frac{1}{2} \|y_j - y_j^k\|_{H_j}^2 \}$  for all  $j \in [m]$ ;
  - 10:    $x_{k+1} = \arg \min_x \hat{\mathcal{L}}_\rho(x, y_{[m]}^{k+1}, z_k, v_k)$ ;
  - 11:    $z_{k+1} = z_k - \rho(Ax_{k+1} + \sum_{j=1}^m B_j y_j^{k+1} - c)$ ;
  - 12: **end for**
  - 13: **Output:**  $\{x, y_{[m]}, z\}$  chosen uniformly random from  $\{x_k, y_{[m]}^k, z_k\}_{k=1}^K$ .
-

**Lemma 2.** Under Assumption 1 and given the sequence  $\{x_k, y_{[m]}^k, z_k\}_{k=1}^K$  from Algorithm 1, it holds that

$$\begin{aligned} \mathbb{E}\|z_{k+1} - z_k\|^2 &\leq \frac{18L^2}{\sigma_{\min}^A b} \sum_{i=(n_k-1)q}^{k-1} \mathbb{E}\|x_{i+1} - x_i\|^2 + \left(\frac{9L^2}{\sigma_{\min}^A} + \frac{3\sigma_{\max}^2(G)}{\sigma_{\min}^A \eta^2}\right) \|x_k - x_{k-1}\|^2 \\ &\quad + \frac{3\sigma_{\max}^2(G)}{\sigma_{\min}^A \eta^2} \|x_{k+1} - x_k\|^2. \end{aligned} \quad (7)$$

*Proof.* Using the optimal condition of the step 10 in Algorithm 1, we have

$$v_k + \frac{G}{\eta}(x_{k+1} - x_k) - A^T z_k + \rho A^T (Ax_{k+1} + \sum_{j=1}^m B_j y_j^{k+1} - c) = 0. \quad (8)$$

Using the step 11 of Algorithm 1, we have

$$A^T z_{k+1} = v_k + \frac{G}{\eta}(x_{k+1} - x_k). \quad (9)$$

It follows that

$$z_{k+1} = (A^T)^+(v_k + \frac{G}{\eta}(x_{k+1} - x_k)), \quad (10)$$

where  $(A^T)^+$  is the pseudoinverse of  $A^T$ . By Assumption 4, i.e.,  $A$  is a full column matrix, we have  $(A^T)^+ = A(A^T A)^{-1}$ . By (10), we have

$$\begin{aligned} \mathbb{E}\|z_{k+1} - z_k\|^2 &= \mathbb{E}\|(A^T)^+(v_k + \frac{G}{\eta}(x_{k+1} - x_k) - v_{k-1} - \frac{G}{\eta}(x_k - x_{k-1}))\|^2 \\ &\leq \frac{1}{\sigma_{\min}^A} \mathbb{E}\|v_k + \frac{G}{\eta}(x_{k+1} - x_k) - v_{k-1} - \frac{G}{\eta}(x_k - x_{k-1})\|^2 \\ &\leq \frac{1}{\sigma_{\min}^A} [3\mathbb{E}\|v_k - v_{k-1}\|^2 + \frac{3\sigma_{\max}^2(G)}{\eta^2} \mathbb{E}\|x_{k+1} - x_k\|^2 + \frac{3\sigma_{\max}^2(G)}{\eta^2} \mathbb{E}\|x_k - x_{k-1}\|^2], \end{aligned} \quad (11)$$

where the first inequality follows by  $((A^T)^+)^T (A^T)^+ = (A(A^T A)^{-1})^T A(A^T A)^{-1} = (A^T A)^{-1}$ ; the second inequality holds by the inequality  $\|\sum_{i=1}^r \alpha_i\|^2 \leq r \sum_{i=1}^r \|\alpha_i\|^2$ .

Next, considering the upper bound of  $\|v_k - v_{k-1}\|^2$ , we have

$$\begin{aligned} \mathbb{E}\|v_k - v_{k-1}\|^2 &= \mathbb{E}\|v_k - \nabla f(x_k) + \nabla f(x_k) - \nabla f(x_{k-1}) + \nabla f(x_{k-1}) - v_{k-1}\|^2 \\ &\leq 3\mathbb{E}\|v_k - \nabla f(x_k)\|^2 + 3\mathbb{E}\|\nabla f(x_k) - \nabla f(x_{k-1})\|^2 + 3\mathbb{E}\|\nabla f(x_{k-1}) - v_{k-1}\|^2 \\ &\leq \frac{3L^2}{b} \sum_{i=(n_k-1)q}^{k-1} \mathbb{E}\|x_{i+1} - x_i\|^2 + 3L^2 \mathbb{E}\|x_{k-1} - x_k\|^2 + \frac{3L^2}{b} \sum_{i=(n_k-1)q}^{k-2} \mathbb{E}\|x_{i+1} - x_i\|^2 \\ &\leq \frac{6L^2}{b} \sum_{i=(n_k-1)q}^{k-1} \mathbb{E}\|x_{i+1} - x_i\|^2 + 3L^2 \mathbb{E}\|x_{k-1} - x_k\|^2, \end{aligned} \quad (12)$$

where the second inequality holds by Assumption 1 and the inequality (5).

Finally, combining the inequalities (11) and (12), we obtain the above result.  $\square$

**Lemma 3.** Suppose the sequence  $\{x_k, y_{[m]}^k, z_k\}_{k=1}^K$  is generated from Algorithm 1, and define a Lyapunov function  $R_k$  as follows:

$$R_k = \mathcal{L}_\rho(x_k, y_{[m]}^k, z_k) + \left(\frac{9L^2}{\sigma_{\min}^A \rho} + \frac{3\sigma_{\max}^2(G)}{\sigma_{\min}^A \eta^2 \rho}\right) \|x_k - x_{k-1}\|^2 + \frac{2L^2}{\sigma_{\min}^A \rho b} \sum_{i=(n_k-1)q}^{k-1} \mathbb{E}\|x_{i+1} - x_i\|^2. \quad (13)$$

Let  $b = q$ ,  $\eta = \frac{2\alpha\sigma_{\min}(G)}{3L}$  ( $0 < \alpha \leq 1$ ) and  $\rho = \frac{\sqrt{170}\kappa_G L}{\sigma_{\min}^A \alpha}$ , then we have

$$\frac{1}{K} \sum_{k=0}^{K-1} (\|x_{k+1} - x_k\|^2 + \sum_{j=1}^m \|y_j^k - y_j^{k+1}\|^2) \leq \frac{\mathbb{E}[R_0] - R^*}{K\gamma}, \quad (14)$$

where  $\gamma = \min(\chi, \sigma_{\min}^H)$  with  $\chi \geq \frac{\sqrt{170}\kappa_G L}{4\alpha}$  and  $R^*$  is a lower bound of the function  $R_k$ .

*Proof.* By the optimal condition of step 9 in Algorithm 1, we have, for  $j \in [m]$

$$\begin{aligned} 0 &= (y_j^k - y_j^{k+1})^T (\partial g_j(y_j^{k+1}) - B_j^T z_k + \rho B_j^T (Ax_k + \sum_{i=1}^j B_i y_i^{k+1} + \sum_{i=j+1}^m B_i y_i^k - c) + H_j (y_j^{k+1} - y_j^k)) \\ &\leq g_j(y_j^k) - g_j(y_j^{k+1}) - (z_k)^T (B_j y_j^k - B_j y_j^{k+1}) + \rho (B_j y_j^k - B_j y_j^{k+1})^T (Ax_k + \sum_{i=1}^j B_i y_i^{k+1} + \sum_{i=j+1}^m B_i y_i^k - c) - \|y_j^{k+1} - y_j^k\|_{H_j}^2 \\ &= g_j(y_j^k) - g_j(y_j^{k+1}) - (z_k)^T (Ax_k + \sum_{i=1}^{j-1} B_i y_i^{k+1} + \sum_{i=j}^m B_i y_i^k - c) + (z_k)^T (Ax_k + \sum_{i=1}^j B_i y_i^{k+1} + \sum_{i=j+1}^m B_i y_i^k - c) \\ &\quad + \frac{\rho}{2} \|Ax_k + \sum_{i=1}^{j-1} B_i y_i^{k+1} + \sum_{i=j}^m B_i y_i^k - c\|^2 - \frac{\rho}{2} \|Ax_k + \sum_{i=1}^j B_i y_i^{k+1} + \sum_{i=j+1}^m B_i y_i^k - c\|^2 - \frac{\rho}{2} \|B_j y_j^k - B_j y_j^{k+1}\|^2 - \|y_j^{k+1} - y_j^k\|_{H_j}^2 \\ &= \underbrace{f(x_k) + \sum_{i=1}^{j-1} g_i(y_i^{k+1}) + \sum_{i=j}^m g_i(y_i^k) - (z_k)^T (Ax_k + \sum_{i=1}^{j-1} B_i y_i^{k+1} + \sum_{i=j}^m B_i y_i^k - c) + \frac{\rho}{2} \|Ax_k + \sum_{i=1}^{j-1} B_i y_i^{k+1} + \sum_{i=j}^m B_i y_i^k - c\|^2}_{\mathcal{L}_\rho(x_k, y_{[j-1]}^{k+1}, y_{[j:m]}^k, z_k)} \\ &\quad - \underbrace{(f(x_k) + \sum_{i=1}^j g_i(y_i^{k+1}) + \sum_{i=j+1}^m g_i(y_i^k) - (z_k)^T (Ax_k + \sum_{i=1}^j B_i y_i^{k+1} + \sum_{i=j+1}^m B_i y_i^k - c) + \frac{\rho}{2} \|Ax_k + \sum_{i=1}^j B_i y_i^{k+1} + \sum_{i=j+1}^m B_i y_i^k - c\|^2)}_{\mathcal{L}_\rho(x_k, y_{[j]}^{k+1}, y_{[j+1:m]}^k, z_k)} \\ &\quad - \frac{\rho}{2} \|B_j y_j^k - B_j y_j^{k+1}\|^2 - \|y_j^{k+1} - y_j^k\|_{H_j}^2 \\ &\leq \mathcal{L}_\rho(x_k, y_{[j-1]}^{k+1}, y_{[j:m]}^k, z_k) - \mathcal{L}_\rho(x_k, y_{[j]}^{k+1}, y_{[j+1:m]}^k, z_k) - \sigma_{\min}(H_j) \|y_j^k - y_j^{k+1}\|^2, \end{aligned} \quad (15)$$

where the first inequality holds by the convexity of function  $g_j(y)$ , and the second equality follows by applying the equality  $(a-b)^T b = \frac{1}{2}(\|a\|^2 - \|b\|^2 - \|a-b\|^2)$  on the term  $(B_j y_j^k - B_j y_j^{k+1})^T (Ax_k + \sum_{i=1}^j B_i y_i^{k+1} + \sum_{i=j+1}^m B_i y_i^k - c)$ . Thus, we have, for all  $j \in [m]$

$$\mathcal{L}_\rho(x_k, y_{[j]}^{k+1}, y_{[j+1:m]}^k, z_k) \leq \mathcal{L}_\rho(x_k, y_{[j-1]}^{k+1}, y_{[j:m]}^k, z_k) - \sigma_{\min}(H_j) \|y_j^k - y_j^{k+1}\|^2. \quad (16)$$

Telescoping inequality (16) over  $j$  from 1 to  $m$ , we obtain

$$\mathcal{L}_\rho(x_k, y_{[m]}^{k+1}, z_k) \leq \mathcal{L}_\rho(x_k, y_{[m]}^k, z_k) - \sigma_{\min}^H \sum_{j=1}^m \|y_j^k - y_j^{k+1}\|^2, \quad (17)$$

where  $\sigma_{\min}^H = \min_{j \in [m]} \sigma_{\min}(H_j)$ .

By Assumption 1, we have

$$0 \leq f(x_k) - f(x_{k+1}) + \nabla f(x_k)^T (x_{k+1} - x_k) + \frac{L}{2} \|x_{k+1} - x_k\|^2. \quad (18)$$

Using the optimal condition of step 10 in Algorithm 1, we have

$$0 = (x_k - x_{k+1})^T (v_k - A^T z_k + \rho A^T (Ax_{k+1} + \sum_{j=1}^m B_j y_j^{k+1} - c) + \frac{G}{\eta} (x_{k+1} - x_k)). \quad (19)$$

Combining (18) and (19), we have

$$\begin{aligned}
 0 &\leq f(x_k) - f(x_{k+1}) + \nabla f(x_k)^T(x_{k+1} - x_k) + \frac{L}{2}\|x_{k+1} - x_k\|^2 \\
 &\quad + (x_k - x_{k+1})^T(v_k - A^T z_k + \rho A^T(Ax_{k+1} + \sum_{j=1}^m B_j y_j^{k+1} - c)) + \frac{G}{\eta}(x_{k+1} - x_k) \\
 &= f(x_k) - f(x_{k+1}) + \frac{L}{2}\|x_k - x_{k+1}\|^2 - \frac{1}{\eta}\|x_k - x_{k+1}\|_G^2 + (x_k - x_{k+1})^T(v_k - \nabla f(x_k)) \\
 &\quad - (z_k)^T(Ax_k - Ax_{k+1}) + \rho(Ax_k - Ax_{k+1})^T(Ax_{k+1} + \sum_{j=1}^m B_j y_j^{k+1} - c) \\
 &= f(x_k) - f(x_{k+1}) + \frac{L}{2}\|x_k - x_{k+1}\|^2 - \frac{1}{\eta}\|x_k - x_{k+1}\|_G^2 + (x_k - x_{k+1})^T(v_k - \nabla f(x_k)) - (z_k)^T(Ax_k + \sum_{j=1}^m B_j y_j^{k+1} - c) \\
 &\quad + (z_k)^T(Ax_{k+1} + \sum_{j=1}^m B_j y_j^{k+1} - c) + \frac{\rho}{2}(\|Ax_k + \sum_{j=1}^m B_j y_j^{k+1} - c\|^2 - \|Ax_{k+1} + \sum_{j=1}^m B_j y_j^{k+1} - c\|^2 - \|Ax_k - Ax_{k+1}\|^2) \\
 &= f(x_k) + \underbrace{\sum_{j=1}^m g_j(y_j^{k+1}) - z_k^T(Ax_k + \sum_{j=1}^m B_j y_j^{k+1} - c) + \frac{\rho}{2}\|Ax_k + \sum_{j=1}^m B_j y_j^{k+1} - c\|^2}_{L_\rho(x_k, y_{[m]}^{k+1}, z_k)} \\
 &\quad - \underbrace{(f(x_{k+1}) + \sum_{j=1}^m g_j(y_j^{k+1}) - z_k^T(Ax_{k+1} + \sum_{j=1}^m B_j y_j^{k+1} - c) + \frac{\rho}{2}\|Ax_{k+1} + \sum_{j=1}^m B_j y_j^{k+1} - c\|^2)}_{L_\rho(x_{k+1}, y_{[m]}^{k+1}, z_k)} \\
 &\quad + \frac{L}{2}\|x_k - x_{k+1}\|^2 + (x_k - x_{k+1})^T(v_k - \nabla f(x_k)) - \frac{1}{\eta}\|x_k - x_{k+1}\|_G^2 - \frac{\rho}{2}\|Ax_k - Ax_{k+1}\|^2 \\
 &\leq \mathcal{L}_\rho(x_k, y_{[m]}^{k+1}, z_k) - \mathcal{L}_\rho(x_{k+1}, y_{[m]}^{k+1}, z_k) - \left(\frac{\sigma_{\min}(G)}{\eta} + \frac{\rho\sigma_{\min}^A}{2} - \frac{L}{2}\right)\|x_{k+1} - x_k\|^2 + (x_k - x_{k+1})^T(v_k - \nabla f(x_k)) \\
 &\leq \mathcal{L}_\rho(x_k, y_{[m]}^{k+1}, z_k) - \mathcal{L}_\rho(x_{k+1}, y_{[m]}^{k+1}, z_k) - \left(\frac{\sigma_{\min}(G)}{\eta} + \frac{\rho\sigma_{\min}^A}{2} - L\right)\|x_{k+1} - x_k\|^2 + \frac{1}{2L}\|v_k - \nabla f(x_k)\|^2 \\
 &\leq \mathcal{L}_\rho(x_k, y_{[m]}^{k+1}, z_k) - \mathcal{L}_\rho(x_{k+1}, y_{[m]}^{k+1}, z_k) - \left(\frac{\sigma_{\min}(G)}{\eta} + \frac{\rho\sigma_{\min}^A}{2} - L\right)\|x_{k+1} - x_k\|^2 + \frac{L}{2b} \sum_{i=(n_k-1)q}^{k-1} \mathbb{E}\|x_{i+1} - x_i\|^2,
 \end{aligned}$$

where the second equality follows by applying the equality  $(a - b)^T b = \frac{1}{2}(\|a\|^2 - \|b\|^2 - \|a - b\|^2)$  over the term  $(Ax_k - Ax_{k+1})^T(Ax_{k+1} + \sum_{j=1}^m B_j y_j^{k+1} - c)$ ; the third inequality follows by the inequality  $a^T b \leq \frac{1}{2L}\|a\|^2 + \frac{L}{2}\|b\|^2$ , and the fourth inequality holds by the inequality (5). It follows that

$$\mathcal{L}_\rho(x_{k+1}, y_{[m]}^{k+1}, z_k) \leq \mathcal{L}_\rho(x_k, y_{[m]}^{k+1}, z_k) - \left(\frac{\sigma_{\min}(G)}{\eta} + \frac{\rho\sigma_{\min}^A}{2} - L\right)\|x_{k+1} - x_k\|^2 + \frac{L}{2b} \sum_{i=(n_k-1)q}^{k-1} \mathbb{E}\|x_{i+1} - x_i\|^2. \quad (20)$$

Using the step 10 in Algorithm 1, we have

$$\begin{aligned}
 \mathcal{L}_\rho(x_{k+1}, y_{[m]}^{k+1}, z_{k+1}) - \mathcal{L}_\rho(x_{k+1}, y_{[m]}^{k+1}, z_k) &= \frac{1}{\rho}\|z_{k+1} - z_k\|^2 \\
 &\leq \frac{18L^2}{\sigma_{\min}^A b \rho} \sum_{i=(n_k-1)q}^{k-1} \mathbb{E}\|x_{i+1} - x_i\|^2 + \left(\frac{9L^2}{\sigma_{\min}^A \rho} + \frac{3\sigma_{\max}^2(G)}{\sigma_{\min}^A \eta^2 \rho}\right)\|x_k - x_{k-1}\|^2 \\
 &\quad + \frac{3\sigma_{\max}^2(G)}{\sigma_{\min}^A \eta^2 \rho}\|x_{k+1} - x_k\|^2, \quad (21)
 \end{aligned}$$

where the above inequality holds by Lemma 2.

Combining (17), (20) and (21), we have

$$\begin{aligned} \mathcal{L}_\rho(x_{k+1}, y_{[m]}^{k+1}, z_{k+1}) &\leq \mathcal{L}_\rho(x_k, y_{[m]}^k, z_k) - \sigma_{\min}^H \sum_{j=1}^m \|y_j^k - y_j^{k+1}\|^2 - \left( \frac{\sigma_{\min}(G)}{\eta} + \frac{\rho\sigma_{\min}^A}{2} - L - \frac{3\sigma_{\max}^2(G)}{\sigma_{\min}^A\eta^2\rho} \right) \|x_{k+1} - x_k\|^2 \\ &\quad + \left( \frac{L}{2b} + \frac{18L^2}{\sigma_{\min}^A b\rho} \right) \sum_{i=(n_k-1)q}^{k-1} \mathbb{E}\|x_{i+1} - x_i\|^2 + \left( \frac{9L^2}{\sigma_{\min}^A\rho} + \frac{3\sigma_{\max}^2(G)}{\sigma_{\min}^A\eta^2\rho} \right) \|x_k - x_{k-1}\|^2. \end{aligned} \quad (22)$$

Next, we define a *Lyapunov* function  $R_k$ :

$$R_k = \mathcal{L}_\rho(x_k, y_{[m]}^k, z_k) + \left( \frac{9L^2}{\sigma_{\min}^A\rho} + \frac{3\sigma_{\max}^2(G)}{\sigma_{\min}^A\eta^2\rho} \right) \|x_k - x_{k-1}\|^2 + \frac{2L^2}{\sigma_{\min}^A\rho b} \sum_{i=(n_k-1)q}^{k-1} \mathbb{E}\|x_{i+1} - x_i\|^2. \quad (23)$$

It follows that

$$\begin{aligned} R_{k+1} &= \mathcal{L}_\rho(x_{k+1}, y_{[m]}^{k+1}, z_{k+1}) + \left( \frac{9L^2}{\sigma_{\min}^A\rho} + \frac{3\sigma_{\max}^2(G)}{\sigma_{\min}^A\eta^2\rho} \right) \|x_{k+1} - x_k\|^2 + \frac{2L^2}{\sigma_{\min}^A\rho b} \sum_{i=(n_k-1)q}^k \mathbb{E}\|x_{i+1} - x_i\|^2 \\ &\leq \mathcal{L}_\rho(x_k, y_{[m]}^k, z_k) + \left( \frac{9L^2}{\sigma_{\min}^A\rho} + \frac{3\sigma_{\max}^2(G)}{\sigma_{\min}^A\eta^2\rho} \right) \|x_k - x_{k-1}\|^2 + \frac{2L^2}{\sigma_{\min}^A\rho b} \sum_{i=(n_k-1)q}^{k-1} \mathbb{E}\|x_{i+1} - x_i\|^2 \\ &\quad - \left( \frac{\sigma_{\min}(G)}{\eta} + \frac{\rho\sigma_{\min}^A}{2} - L - \frac{6\sigma_{\max}^2(G)}{\sigma_{\min}^A\eta^2\rho} - \frac{9L^2}{\sigma_{\min}^A\rho} - \frac{2L^2}{\sigma_{\min}^A\rho b} \right) \|x_{k+1} - x_k\|^2 - \sigma_{\min}^H \sum_{j=1}^m \|y_j^k - y_j^{k+1}\|^2 \\ &\quad + \left( \frac{L}{2b} + \frac{18L^2}{\sigma_{\min}^A b\rho} \right) \sum_{i=(n_k-1)q}^{k-1} \mathbb{E}\|x_{i+1} - x_i\|^2 \\ &\leq R_k - \left( \frac{\sigma_{\min}(G)}{\eta} + \frac{\rho\sigma_{\min}^A}{2} - L - \frac{6\sigma_{\max}^2(G)}{\sigma_{\min}^A\eta^2\rho} - \frac{9L^2}{\sigma_{\min}^A\rho} - \frac{2L^2}{\sigma_{\min}^A\rho b} \right) \|x_{k+1} - x_k\|^2 - \sigma_{\min}^H \sum_{j=1}^m \|y_j^k - y_j^{k+1}\|^2 \\ &\quad + \left( \frac{L}{2b} + \frac{18L^2}{\sigma_{\min}^A b\rho} \right) \sum_{i=(n_k-1)q}^{k-1} \mathbb{E}\|x_{i+1} - x_i\|^2, \end{aligned} \quad (24)$$

where the first inequality holds by the inequality (22) and the equality

$$\sum_{i=(n_k-1)q}^k \mathbb{E}\|x_{i+1} - x_i\|^2 = \sum_{i=(n_k-1)q}^{k-1} \mathbb{E}\|x_{i+1} - x_i\|^2 + \mathbb{E}\|x_{k+1} - x_k\|^2.$$

Since  $(n_k - 1)q \leq k \leq n_k q - 1$ , and let  $(n_k - 1)q \leq l \leq n_k q - 1$ , telescoping inequality (24) over  $k$  from  $(n_k - 1)q$  to  $k$ ,

we have

$$\begin{aligned}
 \mathbb{E}[R_{k+1}] &\leq \mathbb{E}[R_{(n_k-1)q}] - \left( \frac{\sigma_{\min}(G)}{\eta} + \frac{\rho\sigma_{\min}^A}{2} - L - \frac{6\sigma_{\max}^2(G)}{\sigma_{\min}^A\eta^2\rho} - \frac{9L^2}{\sigma_{\min}^A\rho} - \frac{2L^2}{\sigma_{\min}^A\rho b} \right) \sum_{l=(n_k-1)q}^k \|x_{l+1} - x_l\|^2 \\
 &\quad - \sigma_{\min}^H \sum_{l=(n_k-1)q}^k \sum_{j=1}^m \|y_j^l - y_j^{l+1}\|^2 + \left( \frac{L}{2b} + \frac{18L^2}{\sigma_{\min}^A b\rho} \right) \sum_{l=(n_k-1)q}^k \sum_{i=(n_k-1)q}^{k-1} \mathbb{E}\|x_{i+1} - x_i\|^2 \\
 &\leq \mathbb{E}[R_{(n_k-1)q}] - \left( \frac{\sigma_{\min}(G)}{\eta} + \frac{\rho\sigma_{\min}^A}{2} - L - \frac{6\sigma_{\max}^2(G)}{\sigma_{\min}^A\eta^2\rho} - \frac{9L^2}{\sigma_{\min}^A\rho} - \frac{2L^2}{\sigma_{\min}^A\rho b} \right) \sum_{i=(n_k-1)q}^k \|x_{i+1} - x_i\|^2 \\
 &\quad - \sigma_{\min}^H \sum_{i=(n_k-1)q}^{k-1} \sum_{j=1}^m \|y_j^i - y_j^{i+1}\|^2 + \left( \frac{Lq}{2b} + \frac{18L^2q}{\sigma_{\min}^A b\rho} \right) \sum_{i=(n_k-1)q}^k \mathbb{E}\|x_{i+1} - x_i\|^2 \\
 &= \mathbb{E}[R_{(n_k-1)q}] - \underbrace{\left( \frac{\sigma_{\min}(G)}{\eta} + \frac{\rho\sigma_{\min}^A}{2} - L - \frac{6\sigma_{\max}^2(G)}{\sigma_{\min}^A\eta^2\rho} - \frac{9L^2}{\sigma_{\min}^A\rho} - \frac{2L^2}{\sigma_{\min}^A\rho b} - \frac{Lq}{2b} - \frac{18L^2q}{\sigma_{\min}^A b\rho} \right)}_{\chi} \sum_{i=(n_k-1)q}^k \|x_{i+1} - x_i\|^2 \\
 &\quad - \sigma_{\min}^H \sum_{i=(n_k-1)q}^{k-1} \sum_{j=1}^m \|y_j^i - y_j^{i+1}\|^2, \tag{25}
 \end{aligned}$$

where the second inequality holds by the fact that

$$\sum_{l=(n_k-1)q}^k \sum_{i=(n_k-1)q}^{k-1} \mathbb{E}\|x_{i+1} - x_i\|^2 \leq \sum_{l=(n_k-1)q}^k \sum_{i=(n_k-1)q}^k \mathbb{E}\|x_{i+1} - x_i\|^2 \leq q \sum_{i=(n_k-1)q}^k \mathbb{E}\|x_{i+1} - x_i\|^2.$$

Since  $b = q$ , we have

$$\begin{aligned}
 \chi &= \frac{\sigma_{\min}(G)}{\eta} + \frac{\rho\sigma_{\min}^A}{2} - L - \frac{6\sigma_{\max}^2(G)}{\sigma_{\min}^A\eta^2\rho} - \frac{9L^2}{\sigma_{\min}^A\rho} - \frac{2L^2}{\sigma_{\min}^A\rho b} - \frac{Lq}{2b} - \frac{18L^2q}{\sigma_{\min}^A b\rho} \\
 &= \underbrace{\frac{\sigma_{\min}(G)}{\eta} - \frac{3L}{2}}_{L_1} + \underbrace{\frac{\rho\sigma_{\min}^A}{2} - \frac{6\sigma_{\max}^2(G)}{\sigma_{\min}^A\eta^2\rho} - \frac{27L^2}{\sigma_{\min}^A\rho} - \frac{2L^2}{\sigma_{\min}^A\rho b}}_{L_2}. \tag{26}
 \end{aligned}$$

Given  $0 < \eta \leq \frac{2\sigma_{\min}(G)}{3L}$ , we have  $L_1 \geq 0$ . Further, let  $\eta = \frac{2\alpha\sigma_{\min}(G)}{3L}$  ( $0 < \alpha \leq 1$ ) and  $\rho = \frac{\sqrt{170}\kappa_G L}{\sigma_{\min}^A \alpha}$ , we have

$$\begin{aligned}
 L_2 &= \frac{\rho\sigma_{\min}^A}{2} - \frac{6\sigma_{\max}^2(G)}{\sigma_{\min}^A\eta^2\rho} - \frac{27L^2}{\sigma_{\min}^A\rho} - \frac{2L^2}{\sigma_{\min}^A\rho b} \\
 &= \frac{\rho\sigma_{\min}^A}{2} - \frac{27L^2\kappa_G^2}{2\sigma_{\min}^A\rho\alpha^2} - \frac{27L^2}{\sigma_{\min}^A\rho} - \frac{2L^2}{\sigma_{\min}^A\rho b} \\
 &\geq \frac{\rho\sigma_{\min}^A}{2} - \frac{27L^2\kappa_G^2}{2\sigma_{\min}^A\rho\alpha^2} - \frac{27L^2\kappa_G^2}{\sigma_{\min}^A\rho\alpha^2} - \frac{2\kappa_G^2 L^2}{\sigma_{\min}^A\rho\alpha^2} \\
 &= \frac{\rho\sigma_{\min}^A}{4} + \underbrace{\frac{\rho\sigma_{\min}^A}{4} - \frac{85L^2\kappa_G^2}{2\sigma_{\min}^A\rho\alpha^2}}_{\geq 0} \\
 &\geq \frac{\sqrt{170}\kappa_G L}{4\alpha}, \tag{27}
 \end{aligned}$$

where the first inequality holds by  $\kappa_G \geq 1$  and  $b \geq 1 \geq \alpha^2$  and the second inequality holds by  $\rho = \frac{\sqrt{170}\kappa_G L}{\sigma_{\min}^A \alpha}$ . Thus, we obtain  $\chi \geq \frac{\sqrt{170}\kappa_G L}{4\alpha}$ .

Since  $A$  is a full column rank matrix, we have  $(A^T)^+ = A(A^T A)^{-1}$ . It follows that  $\sigma_{\max}((A^T)^+)^T(A^T)^+ = \sigma_{\max}((A^T A)^{-1}) = \frac{1}{\sigma_{\min}^A}$ . Using (10), then we have

$$\begin{aligned}
 \mathcal{L}_\rho(x_{k+1}, y_{[m]}^{k+1}, z_{k+1}) &= f(x_{k+1}) + \sum_{j=1}^m g_j(y_j^{k+1}) - z_{k+1}^T(Ax_{k+1} + \sum_{j=1}^m B_j y_j^{k+1} - c) + \frac{\rho}{2} \|Ax_{k+1} + \sum_{j=1}^m B_j y_j^{k+1} - c\|^2 \\
 &= f(x_{k+1}) + \sum_{j=1}^m g_j(y_j^{k+1}) - \langle (A^T)^+(v_k + \frac{G}{\eta}(x_{k+1} - x_k)), Ax_{k+1} + \sum_{j=1}^m B_j y_j^{k+1} - c \rangle + \frac{\rho}{2} \|Ax_{k+1} + \sum_{j=1}^m B_j y_j^{k+1} - c\|^2 \\
 &= f(x_{k+1}) + \sum_{j=1}^m g_j(y_j^{k+1}) - \langle (A^T)^+(v_k - \nabla f(x_k) + \nabla f(x_k) + \frac{G}{\eta}(x_{k+1} - x_k)), Ax_{k+1} + \sum_{j=1}^m B_j y_j^{k+1} - c \rangle \\
 &\quad + \frac{\rho}{2} \|Ax_{k+1} + \sum_{j=1}^m B_j y_j^{k+1} - c\|^2 \\
 &\geq f(x_{k+1}) + \sum_{j=1}^m g_j(y_j^{k+1}) - \frac{2}{\sigma_{\min}^A \rho} \|v_k - \nabla f(x_k)\|^2 - \frac{2}{\sigma_{\min}^A \rho} \|\nabla f(x_k)\|^2 - \frac{2\sigma_{\max}^2(G)}{\sigma_{\min}^A \eta^2 \rho} \|x_{k+1} - x_k\|^2 \\
 &\quad + \frac{\rho}{8} \|Ax_{k+1} + \sum_{j=1}^m B_j y_j^{k+1} - c\|^2 \\
 &\geq f(x_{k+1}) + \sum_{j=1}^m g_j(y_j^{k+1}) - \frac{2L^2}{\sigma_{\min}^A b \rho} \sum_{i=(n_k-1)q}^{k-1} \mathbb{E}\|x_{i+1} - x_i\|^2 - \frac{2\delta^2}{\sigma_{\min}^A \rho} - \frac{2\sigma_{\max}^2(G)}{\sigma_{\min}^A \eta^2 \rho} \|x_{k+1} - x_k\|^2
 \end{aligned} \tag{28}$$

where the first inequality is obtained by applying  $\langle a, b \rangle \leq \frac{1}{2\beta} \|a\|^2 + \frac{\beta}{2} \|b\|^2$  to the terms  $\langle (A^T)^+(v_k - \nabla f(x_k)), Ax_{k+1} + \sum_{j=1}^m B_j y_j^{k+1} - c \rangle$ ,  $\langle (A^T)^+ v_k, Ax_{k+1} + \sum_{j=1}^m B_j y_j^{k+1} - c \rangle$  and  $\langle (A^T)^+ \frac{G}{\eta}(x_{k+1} - x_k), Ax_{k+1} + \sum_{j=1}^m B_j y_j^{k+1} - c \rangle$  with  $\beta = \frac{\rho}{4}$ , respectively; and the second inequality follows by the inequality (5) and Assumption 3. Using the definition of  $R_k$ , we have

$$R_{k+1} \geq f^* + \sum_{j=1}^m g_j^* - \frac{2\delta^2}{\sigma_{\min}^A \rho}, \quad \forall k = 0, 1, 2, \dots \tag{29}$$

It follows that the function  $R_k$  is bounded from below. Let  $R^*$  denotes a lower bound of function  $R_k$ .

Telescoping inequality (25) over  $k$  from 0 to  $K$ , we have

$$\begin{aligned}
 \mathbb{E}[R_K] - \mathbb{E}[R_0] &= (\mathbb{E}[R_q] - \mathbb{E}[R_0]) + (\mathbb{E}[R_{2q}] - \mathbb{E}[R_q]) + \dots + (\mathbb{E}[R_K] - \mathbb{E}[R_{(n_K-1)q}]) \\
 &\leq - \sum_{i=0}^{q-1} (\chi \|x_{i+1} - x_i\|^2 + \sigma_{\min}^H \sum_{j=1}^m \|y_j^i - y_j^{i+1}\|^2) - \sum_{i=q}^{2q-1} (\chi \|x_{i+1} - x_i\|^2 + \sigma_{\min}^H \sum_{j=1}^m \|y_j^i - y_j^{i+1}\|^2) \\
 &\quad - \dots - \sum_{i=(n_K-1)q}^{K-1} (\chi \|x_{i+1} - x_i\|^2 + \sigma_{\min}^H \sum_{j=1}^m \|y_j^i - y_j^{i+1}\|^2) \\
 &= - \sum_{i=0}^{K-1} (\chi \|x_{i+1} - x_i\|^2 + \sigma_{\min}^H \sum_{j=1}^m \|y_j^i - y_j^{i+1}\|^2).
 \end{aligned} \tag{30}$$

Finally, we obtain

$$\frac{1}{K} \sum_{k=0}^{K-1} (\|x_{k+1} - x_k\|^2 + \sum_{j=1}^m \|y_j^k - y_j^{k+1}\|^2) \leq \frac{\mathbb{E}[R_0] - R^*}{K\gamma}, \tag{31}$$

where  $\gamma = \min(\chi, \sigma_{\min}^H)$  with  $\chi \geq \frac{\sqrt{170}\kappa_G L}{4\alpha}$ .

□



**Theorem 1.** Suppose the sequence  $\{x_k, y_{[m]}^k, z_k\}_{k=1}^K$  is generated from Algorithm 1, and let  $b = q$ ,  $\eta = \frac{2\alpha\sigma_{\min}(G)}{3L}$  ( $0 < \alpha \leq 1$ ),  $\rho = \frac{\sqrt{170}\kappa_G L}{\sigma_{\min}^A \alpha}$ , and

$$\nu_1 = m(\rho^2 \sigma_{\max}^B \sigma_{\max}^A + \rho^2 (\sigma_{\max}^B)^2 + \sigma_{\max}^2(H)), \nu_2 = 3(L^2 + \frac{\sigma_{\max}^2(G)}{\eta^2}), \nu_3 = \frac{18L^2}{\sigma_{\min}^A \rho^2} + \frac{3\sigma_{\max}^2(G)}{\sigma_{\min}^A \eta^2 \rho^2}, \quad (32)$$

then we have

$$\min_{1 \leq k \leq K} \mathbb{E}[\text{dist}(0, \partial L(x_k, y_{[m]}^k, z_k))^2] \leq \frac{\nu_{\max}}{K} \sum_{k=1}^{K-1} \theta_k \leq \frac{3\nu_{\max}(R_0 - R^*)}{K\gamma}, \quad (33)$$

where  $\gamma = \min(\chi, \sigma_{\min}^H)$  with  $\chi \geq \frac{\sqrt{170}\kappa_G L}{4\alpha}$ ,  $\nu_{\max} = \max\{\nu_1, \nu_2, \nu_3\}$  and  $R^*$  is a lower bound of the function  $R_k$ . It implies that the number of iteration  $K$  satisfies

$$K = \frac{3\nu_{\max}(R_0 - R^*)}{\epsilon\gamma}$$

then  $(x_{k^*}, y_{[m]}^{k^*}, z_{k^*})$  is an  $\epsilon$ -approximate stationary point of (1), where  $k^* = \arg \min_k \theta_k$ .

*Proof.* First, we define an useful variable  $\theta_k = \mathbb{E}[\|x_{k+1} - x_k\|^2 + \|x_k - x_{k-1}\|^2 + \frac{1}{q} \sum_{i=(n_k-1)q}^k \|x_{i+1} - x_i\|^2 + \sum_{j=1}^m \|y_j^k - y_j^{k+1}\|^2]$ . By the optimal condition of the step 9 in Algorithm 1, we have, for all  $j \in [m]$

$$\begin{aligned} \mathbb{E}[\text{dist}(0, \partial_{y_j} L(x, y_{[m]}, z))^2]_{k+1} &= \mathbb{E}[\text{dist}(0, \partial g_j(y_j^{k+1}) - B_j^T z_{k+1})^2] \\ &= \|B_j^T z_k - \rho B_j^T (Ax_k + \sum_{i=1}^j B_i y_i^{k+1} + \sum_{i=j+1}^m B_i y_i^k - c) - H_j(y_j^{k+1} - y_j^k) - B_j^T z_{k+1}\|^2 \\ &= \|\rho B_j^T A(x_{k+1} - x_k) + \rho B_j^T \sum_{i=j+1}^m B_i (y_i^{k+1} - y_i^k) - H_j(y_j^{k+1} - y_j^k)\|^2 \\ &\leq m\rho^2 \sigma_{\max}^{B_j} \sigma_{\max}^A \|x_{k+1} - x_k\|^2 + m\rho^2 \sigma_{\max}^{B_j} \sum_{i=j+1}^m \sigma_{\max}^{B_i} \|y_i^{k+1} - y_i^k\|^2 + m\sigma_{\max}^2(H_j) \|y_j^{k+1} - y_j^k\|^2 \\ &\leq m(\rho^2 \sigma_{\max}^B \sigma_{\max}^A + \rho^2 (\sigma_{\max}^B)^2 + \sigma_{\max}^2(H)) \theta_k, \end{aligned} \quad (34)$$

where the first inequality follows by the inequality  $\|\sum_{i=1}^r \alpha_i\|^2 \leq r \sum_{i=1}^r \|\alpha_i\|^2$ .

By the step 10 of Algorithm 1, we have

$$\begin{aligned} \mathbb{E}[\text{dist}(0, \nabla_x L(x, y_{[m]}, z))^2]_{k+1} &= \mathbb{E}\|A^T z_{k+1} - \nabla f(x_{k+1})\|^2 \\ &= \mathbb{E}\|v_k - \nabla f(x_{k+1}) - \frac{G}{\eta}(x_k - x_{k+1})\|^2 \\ &= \mathbb{E}\|v_k - \nabla f(x_k) + \nabla f(x_k) - \nabla f(x_{k+1}) - \frac{G}{\eta}(x_k - x_{k+1})\|^2 \\ &\leq \sum_{i=(n_k-1)q}^{k-1} \frac{3L^2}{b} \mathbb{E}\|x_{i+1} - x_i\|^2 + 3(L^2 + \frac{\sigma_{\max}^2(G)}{\eta^2}) \|x_k - x_{k+1}\|^2 \\ &\leq 3(L^2 + \frac{\sigma_{\max}^2(G)}{\eta^2}) \theta_k, \end{aligned} \quad (35)$$

where the second inequality holds by  $b = q$ .

By the step 11 of Algorithm 1, we have

$$\begin{aligned}
 \mathbb{E}[\text{dist}(0, \nabla_z L(x, y_{[m]}, z))]_{k+1}^2 &= \mathbb{E}\|Ax_{k+1} + \sum_{j=1}^m B_j y_j^{k+1} - c\|^2 \\
 &= \frac{1}{\rho^2} \mathbb{E}\|z_{k+1} - z_k\|^2 \\
 &\leq \frac{18L^2}{\sigma_{\min}^A b \rho^2} \sum_{i=(n_k-1)q}^{k-1} \mathbb{E}\|x_{i+1} - x_i\|^2 + \left(\frac{9L^2}{\sigma_{\min}^A \rho^2} + \frac{3\sigma_{\max}^2(G)}{\sigma_{\min}^A \eta^2 \rho^2}\right) \|x_k - x_{k-1}\|^2 \\
 &\quad + \frac{3\sigma_{\max}^2(G)}{\sigma_{\min}^A \eta^2 \rho^2} \|x_{k+1} - x_k\|^2 \\
 &\leq \left(\frac{18L^2}{\sigma_{\min}^A \rho^2} + \frac{3\sigma_{\max}^2(G)}{\sigma_{\min}^A \eta^2 \rho^2}\right) \theta_k,
 \end{aligned} \tag{36}$$

where the second inequality holds by  $b = q$ .

Let

$$\nu_1 = m(\rho^2 \sigma_{\max}^B \sigma_{\max}^A + \rho^2 (\sigma_{\max}^B)^2 + \sigma_{\max}^2(H)), \quad \nu_2 = 3(L^2 + \frac{\sigma_{\max}^2(G)}{\eta^2}), \quad \nu_3 = \frac{18L^2}{\sigma_{\min}^A \rho^2} + \frac{3\sigma_{\max}^2(G)}{\sigma_{\min}^A \eta^2 \rho^2}. \tag{37}$$

By (31), we have

$$\frac{1}{K} \sum_{k=0}^{K-1} (\|x_{k+1} - x_k\|^2 + \sum_{j=1}^m \|y_j^k - y_j^{k+1}\|^2) \leq \frac{\mathbb{E}[R_0] - R^*}{K\gamma}, \tag{38}$$

where  $\gamma = \min(\chi, \sigma_{\min}^H)$  with  $\chi \geq \frac{\sqrt{170}\kappa_G L}{4\alpha}$ . Since

$$\sum_{k=0}^{K-1} \sum_{i=(n_k-1)q}^k \|x_{i+1} - x_i\|^2 \leq q \sum_{k=0}^{K-1} \|x_{k+1} - x_k\|^2, \tag{39}$$

by (34), (35) and (36), we have

$$\min_{1 \leq k \leq K} \mathbb{E}[\text{dist}(0, \partial L(x_k, y_{[m]}^k, z_k))]^2 \leq \frac{\nu_{\max}}{K} \sum_{k=1}^{K-1} \theta_k \leq \frac{3\nu_{\max}(R_0 - R^*)}{K\gamma}, \tag{40}$$

where  $\gamma = \min(\chi, \sigma_{\min}^H)$  with  $\chi \geq \frac{\sqrt{170}\kappa_G L}{4\alpha}$  and  $\nu_{\max} = \max\{\nu_1, \nu_2, \nu_3\}$ .

Given  $\eta = \frac{2\alpha\sigma_{\min}(G)}{3L}$  ( $0 < \alpha \leq 1$ ) and  $\rho = \frac{\sqrt{170}\kappa_G L}{\sigma_{\min}^A \alpha}$ , since  $m$  is relatively small, it easy verifies that  $\nu_{\max} = O(1)$  and  $\gamma = O(1)$ , which are independent on  $n$  and  $K$ . Thus, we obtain

$$\min_{1 \leq k \leq K} \mathbb{E}[\text{dist}(0, \partial L(x_k, y_{[m]}^k, z_k))]^2 \leq O\left(\frac{1}{K}\right). \tag{41}$$

□

## 2.2. Convergence Analysis of the Online SPIDER-ADMM Algorithm

In this subsection, we conduct convergence analysis of the online SPIDER-ADMM. First, we give some useful lemmas.

---

### Algorithm 2 Online SPIDER-ADMM Algorithm

---

- 1: **Input:**  $b_1, b_2, q, K, \eta > 0$  and  $\rho > 0$ ;
- 2: **Initialize:**  $x_0 \in \mathbb{R}^d, y_j^0 \in \mathbb{R}^p, j \in [m]$  and  $z_0 \in \mathbb{R}^l$ ;
- 3: **for**  $k = 0, 1, \dots, K - 1$  **do**
- 4:   **if**  $\text{mod}(k, q) = 0$  **then**
- 5:     Draw  $S_1$  samples with  $|S_1| = b_1$ , and compute  $v_k = \frac{1}{b_1} \sum_{i \in S_1} \nabla f_i(x_k)$ ;
- 6:   **else**
- 7:     Draw  $S_2$  samples with  $|S_2| = b_2 = \sqrt{b_1}$ , and compute

$$v_k = \frac{1}{b_2} \sum_{i \in S_2} (\nabla f_i(x_k) - f_i(x_{k-1})) + v_{k-1};$$

- 8:   **end if**
  - 9:    $y_j^{k+1} = \arg \min_{y_j} \{ \mathcal{L}_\rho(x_k, y_j^{k+1}, y_j, y_{[j+1:m]}^k, z_k) + \frac{1}{2} \|y_j - y_j^k\|_{H_j}^2 \}$  for all  $j \in [m]$ ;
  - 10:    $x_{k+1} = \arg \min_x \hat{\mathcal{L}}_\rho(x, y_{[m]}^{k+1}, z_k, v_k)$ ;
  - 11:    $z_{k+1} = z_k - \rho(Ax_{k+1} + \sum_{j=1}^m B_j y_j^{k+1} - c)$ ;
  - 12: **end for**
  - 13: **Output:**  $\{x, y_{[m]}, z\}$  chosen uniformly random from  $\{x_k, y_{[m]}^k, z_k\}_{k=1}^K$ .
- 

**Lemma 4.** Under Assumption 1 and given the sequence  $\{x_k, y_{[m]}^k, z_k\}_{k=1}^K$  from Algorithm 2, it holds that

$$\begin{aligned} \mathbb{E} \|z_{k+1} - z_k\|^2 &\leq \frac{18L^2}{\sigma_{\min}^A b_2} \sum_{i=(n_k-1)q}^{k-1} \mathbb{E} \|x_{i+1} - x_i\|^2 + \frac{72\delta^2}{\sigma_{\min}^A b_1} + \left( \frac{9L^2}{\sigma_{\min}^A} + \frac{3\sigma_{\max}^2(G)}{\sigma_{\min}^A \eta^2} \right) \|x_k - x_{k-1}\|^2 \\ &\quad + \frac{3\sigma_{\max}^2(G)}{\sigma_{\min}^A \eta^2} \|x_{k+1} - x_k\|^2. \end{aligned} \quad (42)$$

*Proof.* The proof of this lemma is the same to the proof of Lemma 2.  $\square$

**Lemma 5.** Suppose the sequence  $\{x_k, y_{[m]}^k, z_k\}_{k=1}^K$  is generated from Algorithm 2, and define a Lyapunov function  $\Phi_k$  as follows:

$$\Phi_k = \mathcal{L}_\rho(x_k, y_{[m]}^k, z_k) + \left( \frac{9L^2}{\sigma_{\min}^A \rho} + \frac{3\sigma_{\max}^2(G)}{\sigma_{\min}^A \eta^2 \rho} \right) \|x_k - x_{k-1}\|^2 + \frac{2L^2}{\sigma_{\min}^A \rho b} \sum_{i=(n_k-1)q}^{k-1} \mathbb{E} \|x_{i+1} - x_i\|^2. \quad (43)$$

Let  $b_2 = q, \eta = \frac{2\alpha\sigma_{\min}(G)}{3L}$  ( $0 < \alpha \leq 1$ ) and  $\rho = \frac{\sqrt{170\kappa_G L}}{\sigma_{\min}^A \alpha}$ , then we have

$$\frac{1}{K} \sum_{k=0}^{K-1} (\|x_{k+1} - x_k\|^2 + \sum_{j=1}^m \|y_j^k - y_j^{k+1}\|^2) \leq \frac{\mathbb{E}[\Phi_0] - \Phi^*}{K\gamma} + \frac{2\delta^2}{b_1 L} + \frac{72\delta^2}{\sigma_{\min}^A b_1 \rho}, \quad (44)$$

where  $\gamma = \min(\chi, \sigma_{\min}^H)$ ,  $\chi \geq \frac{\sqrt{170\kappa_G L}}{4\alpha}$  and  $\Phi^*$  is a lower bound of the function  $\Phi_k$ .

*Proof.* This proof is the same as the proof of Lemma 3.

By the optimal condition of step 9 in Algorithm 2, we have, for  $j \in [m]$

$$\begin{aligned}
 0 &= (y_j^k - y_j^{k+1})^T (\partial g_j(y_j^{k+1}) - B_j^T z_k + \rho B_j^T (Ax_k + \sum_{i=1}^j B_i y_i^{k+1} + \sum_{i=j+1}^m B_i y_i^k - c) + H_j (y_j^{k+1} - y_j^k)) \\
 &\leq g_j(y_j^k) - g_j(y_j^{k+1}) - (z_k)^T (B_j y_j^k - B_j y_j^{k+1}) + \rho (B_j y_j^k - B_j y_j^{k+1})^T (Ax_k + \sum_{i=1}^j B_i y_i^{k+1} + \sum_{i=j+1}^m B_i y_i^k - c) - \|y_j^{k+1} - y_j^k\|_{H_j}^2 \\
 &= g_j(y_j^k) - g_j(y_j^{k+1}) - (z_k)^T (Ax_k + \sum_{i=1}^{j-1} B_i y_i^{k+1} + \sum_{i=j}^m B_i y_i^k - c) + (z_k)^T (Ax_k + \sum_{i=1}^j B_i y_i^{k+1} + \sum_{i=j+1}^m B_i y_i^k - c) \\
 &\quad + \frac{\rho}{2} \|Ax_k + \sum_{i=1}^{j-1} B_i y_i^{k+1} + \sum_{i=j}^m B_i y_i^k - c\|^2 - \frac{\rho}{2} \|Ax_k + \sum_{i=1}^j B_i y_i^{k+1} + \sum_{i=j+1}^m B_i y_i^k - c\|^2 - \frac{\rho}{2} \|B_j y_j^k - B_j y_j^{k+1}\|^2 - \|y_j^{k+1} - y_j^k\|_{H_j}^2 \\
 &= \underbrace{f(x_k) + \sum_{i=1}^{j-1} g_i(y_i^{k+1}) + \sum_{i=j}^m g_i(y_i^k) - (z_k)^T (Ax_k + \sum_{i=1}^{j-1} B_i y_i^{k+1} + \sum_{i=j}^m B_i y_i^k - c) + \frac{\rho}{2} \|Ax_k + \sum_{i=1}^{j-1} B_i y_i^{k+1} + \sum_{i=j}^m B_i y_i^k - c\|^2}_{\mathcal{L}_\rho(x_k, y_{[j-1]}^{k+1}, y_{[j:m]}^k, z_k)} \\
 &\quad - \underbrace{(f(x_k) + \sum_{i=1}^j g_i(y_i^{k+1}) + \sum_{i=j+1}^m g_i(y_i^k) - (z_k)^T (Ax_k + \sum_{i=1}^j B_i y_i^{k+1} + \sum_{i=j+1}^m B_i y_i^k - c) + \frac{\rho}{2} \|Ax_k + \sum_{i=1}^j B_i y_i^{k+1} + \sum_{i=j+1}^m B_i y_i^k - c\|^2)}_{\mathcal{L}_\rho(x_k, y_{[j]}^{k+1}, y_{[j+1:m]}^k, z_k)} \\
 &\quad - \frac{\rho}{2} \|B_j y_j^k - B_j y_j^{k+1}\|^2 - \|y_j^{k+1} - y_j^k\|_{H_j}^2 \\
 &\leq \mathcal{L}_\rho(x_k, y_{[j-1]}^{k+1}, y_{[j:m]}^k, z_k) - \mathcal{L}_\rho(x_k, y_{[j]}^{k+1}, y_{[j+1:m]}^k, z_k) - \sigma_{\min}(H_j) \|y_j^k - y_j^{k+1}\|^2, \tag{45}
 \end{aligned}$$

where the first inequality holds by the convexity of function  $g_j(y)$ , and the second equality follows by applying the equality  $(a - b)^T b = \frac{1}{2}(\|a\|^2 - \|b\|^2 - \|a - b\|^2)$  on the term  $(B_j y_j^k - B_j y_j^{k+1})^T (Ax_k + \sum_{i=1}^j B_i y_i^{k+1} + \sum_{i=j+1}^m B_i y_i^k - c)$ . Thus, we have, for all  $j \in [m]$

$$\mathcal{L}_\rho(x_k, y_{[j]}^{k+1}, y_{[j+1:m]}^k, z_k) \leq \mathcal{L}_\rho(x_k, y_{[j-1]}^{k+1}, y_{[j:m]}^k, z_k) - \sigma_{\min}(H_j) \|y_j^k - y_j^{k+1}\|^2. \tag{46}$$

Telescoping inequality (46) over  $j$  from 1 to  $m$ , we obtain

$$\mathcal{L}_\rho(x_k, y_{[m]}^{k+1}, z_k) \leq \mathcal{L}_\rho(x_k, y_{[m]}^k, z_k) - \sigma_{\min}^H \sum_{j=1}^m \|y_j^k - y_j^{k+1}\|^2. \tag{47}$$

Using Assumption 1, we have

$$0 \leq f(x_k) - f(x_{k+1}) + \nabla f(x_k)^T (x_{k+1} - x_k) + \frac{L}{2} \|x_{k+1} - x_k\|^2. \tag{48}$$

Using the optimal condition of step 10 in Algorithm 2, we have

$$0 = (x_k - x_{k+1})^T (v_k - A^T z_k + \rho A^T (Ax_{k+1} + \sum_{j=1}^m B_j y_j^{k+1} - c) + \frac{G}{\eta} (x_{k+1} - x_k)). \tag{49}$$

Combining (48) and (49), we have

$$\begin{aligned}
 0 &\leq f(x_k) - f(x_{k+1}) + \nabla f(x_k)^T(x_{k+1} - x_k) + \frac{L}{2} \|x_{k+1} - x_k\|^2 \\
 &\quad + (x_k - x_{k+1})^T(v_k - A^T z_k + \rho A^T(Ax_{k+1} + \sum_{j=1}^m B_j y_j^{k+1} - c) + \frac{G}{\eta}(x_{k+1} - x_k)) \\
 &= f(x_k) - f(x_{k+1}) + \frac{L}{2} \|x_k - x_{k+1}\|^2 - \frac{1}{\eta} \|x_k - x_{k+1}\|_G^2 + (x_k - x_{k+1})^T(v_k - \nabla f(x_k)) \\
 &\quad - (z_k)^T(Ax_k - Ax_{k+1}) + \rho(Ax_k - Ax_{k+1})^T(Ax_{k+1} + \sum_{j=1}^m B_j y_j^{k+1} - c) \\
 &= f(x_k) - f(x_{k+1}) + \frac{L}{2} \|x_k - x_{k+1}\|^2 - \frac{1}{\eta} \|x_k - x_{k+1}\|_G^2 + (x_k - x_{k+1})^T(v_k - \nabla f(x_k)) - (z_k)^T(Ax_k + \sum_{j=1}^m B_j y_j^{k+1} - c) \\
 &\quad + (z_k)^T(Ax_{k+1} + \sum_{j=1}^m B_j y_j^{k+1} - c) + \frac{\rho}{2} (\|Ax_k + \sum_{j=1}^m B_j y_j^{k+1} - c\|^2 - \|Ax_{k+1} + \sum_{j=1}^m B_j y_j^{k+1} - c\|^2 - \|Ax_k - Ax_{k+1}\|^2) \\
 &= f(x_k) + \underbrace{\sum_{j=1}^m g_j(y_j^{k+1}) - z_k^T(Ax_k + \sum_{j=1}^m B_j y_j^{k+1} - c) + \frac{\rho}{2} \|Ax_k + \sum_{j=1}^m B_j y_j^{k+1} - c\|^2}_{L_\rho(x_k, y_{[m]}^{k+1}, z_k)} \\
 &\quad - \underbrace{(f(x_{k+1}) + \sum_{j=1}^m g_j(y_j^{k+1}) - z_k^T(Ax_{k+1} + \sum_{j=1}^m B_j y_j^{k+1} - c) + \frac{\rho}{2} \|Ax_{k+1} + \sum_{j=1}^m B_j y_j^{k+1} - c\|^2)}_{L_\rho(x_{k+1}, y_{[m]}^{k+1}, z_k)} \\
 &\quad + \frac{L}{2} \|x_k - x_{k+1}\|^2 + (x_k - x_{k+1})^T(v_k - \nabla f(x_k)) - \frac{1}{\eta} \|x_k - x_{k+1}\|_G^2 - \frac{\rho}{2} \|Ax_k - Ax_{k+1}\|^2 \\
 &\leq \mathcal{L}_\rho(x_k, y_{[m]}^{k+1}, z_k) - \mathcal{L}_\rho(x_{k+1}, y_{[m]}^{k+1}, z_k) - \left(\frac{\sigma_{\min}(G)}{\eta} + \frac{\rho\sigma_{\min}^A}{2} - \frac{L}{2}\right) \|x_{k+1} - x_k\|^2 + (x_k - x_{k+1})^T(v_k - \nabla f(x_k)) \\
 &\leq \mathcal{L}_\rho(x_k, y_{[m]}^{k+1}, z_k) - \mathcal{L}_\rho(x_{k+1}, y_{[m]}^{k+1}, z_k) - \left(\frac{\sigma_{\min}(G)}{\eta} + \frac{\rho\sigma_{\min}^A}{2} - L\right) \|x_{k+1} - x_k\|^2 + \frac{1}{2L} \|v_k - \nabla f(x_k)\|^2 \\
 &\leq \mathcal{L}_\rho(x_k, y_{[m]}^{k+1}, z_k) - \mathcal{L}_\rho(x_{k+1}, y_{[m]}^{k+1}, z_k) - \left(\frac{\sigma_{\min}(G)}{\eta} + \frac{\rho\sigma_{\min}^A}{2} - L\right) \|x_{k+1} - x_k\|^2 + \frac{L}{2b_2} \sum_{i=(n_k-1)q}^{k-1} \mathbb{E} \|x_{i+1} - x_i\|^2 + \frac{2\delta^2}{b_1 L},
 \end{aligned}$$

where the second equality follows by applying the equality  $(a - b)^T b = \frac{1}{2}(\|a\|^2 - \|b\|^2 - \|a - b\|^2)$  over the term  $(Ax_k - Ax_{k+1})^T(Ax_{k+1} + \sum_{j=1}^m B_j y_j^{k+1} - c)$ ; the third inequality follows by the inequality  $a^T b \leq \frac{1}{2L} \|a\|^2 + \frac{L}{2} \|b\|^2$ , and the fourth inequality holds by the inequality (6). It follows that

$$\begin{aligned}
 \mathcal{L}_\rho(x_{k+1}, y_{[m]}^{k+1}, z_k) &\leq \mathcal{L}_\rho(x_k, y_{[m]}^{k+1}, z_k) - \left(\frac{\sigma_{\min}(G)}{\eta} + \frac{\rho\sigma_{\min}^A}{2} - L\right) \|x_{k+1} - x_k\|^2 \\
 &\quad + \frac{L}{2b_2} \sum_{i=(n_k-1)q}^{k-1} \mathbb{E} \|x_{i+1} - x_i\|^2 + \frac{2\delta^2}{b_1 L}. \tag{50}
 \end{aligned}$$

Using the step 11 in Algorithm 2, we have

$$\begin{aligned}
 \mathcal{L}_\rho(x_{k+1}, y_{[m]}^{k+1}, z_{k+1}) - \mathcal{L}_\rho(x_{k+1}, y_{[m]}^{k+1}, z_k) &= \frac{1}{\rho} \|z_{k+1} - z_k\|^2 \\
 &\leq \frac{18L^2}{\sigma_{\min}^A b_2 \rho} \sum_{i=(n_k-1)q}^{k-1} \mathbb{E} \|x_{i+1} - x_i\|^2 + \left( \frac{9L^2}{\sigma_{\min}^A \rho} + \frac{3\sigma_{\max}^2(G)}{\sigma_{\min}^A \eta^2 \rho} \right) \|x_k - x_{k-1}\|^2 \\
 &\quad + \frac{3\sigma_{\max}^2(G)}{\sigma_{\min}^A \eta^2 \rho} \|x_{k+1} - x_k\|^2 + \frac{72\delta^2}{\sigma_{\min}^A b_1 \rho}, \tag{51}
 \end{aligned}$$

where the above inequality holds by Lemma 4.

Combining (47), (50) and (51), we have

$$\begin{aligned}
 \mathcal{L}_\rho(x_{k+1}, y_{[m]}^{k+1}, z_{k+1}) &\leq \mathcal{L}_\rho(x_k, y_{[m]}^k, z_k) - \sigma_{\min}^H \sum_{j=1}^m \|y_j^k - y_j^{k+1}\|^2 - \left( \frac{\sigma_{\min}(G)}{\eta} + \frac{\rho\sigma_{\min}^A}{2} - L - \frac{3\sigma_{\max}^2(G)}{\sigma_{\min}^A \eta^2 \rho} \right) \|x_{k+1} - x_k\|^2 \\
 &\quad + \left( \frac{L}{2b_2} + \frac{18L^2}{\sigma_{\min}^A b_2 \rho} \right) \sum_{i=(n_k-1)q}^{k-1} \mathbb{E} \|x_{i+1} - x_i\|^2 + \left( \frac{9L^2}{\sigma_{\min}^A \rho} + \frac{3\sigma_{\max}^2(G)}{\sigma_{\min}^A \eta^2 \rho} \right) \|x_k - x_{k-1}\|^2 \\
 &\quad + \frac{2\delta^2}{b_1 L} + \frac{72\delta^2}{\sigma_{\min}^A b_1 \rho}. \tag{52}
 \end{aligned}$$

Next, we define an useful *Lyapunov* function  $\Phi_k$ :

$$\Phi_k = \mathcal{L}_\rho(x_k, y_{[m]}^k, z_k) + \left( \frac{9L^2}{\sigma_{\min}^A \rho} + \frac{3\sigma_{\max}^2(G)}{\sigma_{\min}^A \eta^2 \rho} \right) \|x_k - x_{k-1}\|^2 + \frac{2L^2}{\sigma_{\min}^A \rho b_2} \sum_{i=(n_k-1)q}^{k-1} \mathbb{E} \|x_{i+1} - x_i\|^2. \tag{53}$$

It follows that

$$\begin{aligned}
 \Phi_{k+1} &= \mathcal{L}_\rho(x_{k+1}, y_{[m]}^{k+1}, z_{k+1}) + \left( \frac{9L^2}{\sigma_{\min}^A \rho} + \frac{3\sigma_{\max}^2(G)}{\sigma_{\min}^A \eta^2 \rho} \right) \|x_{k+1} - x_k\|^2 + \frac{2L^2}{\sigma_{\min}^A \rho b_2} \sum_{i=(n_k-1)q}^k \mathbb{E} \|x_{i+1} - x_i\|^2 \\
 &\leq \mathcal{L}_\rho(x_k, y_{[m]}^k, z_k) + \left( \frac{9L^2}{\sigma_{\min}^A \rho} + \frac{3\sigma_{\max}^2(G)}{\sigma_{\min}^A \eta^2 \rho} \right) \|x_k - x_{k-1}\|^2 + \frac{2L^2}{\sigma_{\min}^A \rho b_2} \sum_{i=(n_k-1)q}^{k-1} \mathbb{E} \|x_{i+1} - x_i\|^2 \\
 &\quad - \sigma_{\min}^H \sum_{j=1}^m \|y_j^k - y_j^{k+1}\|^2 - \left( \frac{\sigma_{\min}(G)}{\eta} + \frac{\rho\sigma_{\min}^A}{2} - L - \frac{6\sigma_{\max}^2(G)}{\sigma_{\min}^A \eta^2 \rho} - \frac{9L^2}{\sigma_{\min}^A \rho} - \frac{2L^2}{\sigma_{\min}^A \rho b_2} \right) \|x_{k+1} - x_k\|^2 \\
 &\quad - \frac{3(-1)\sigma_{\max}^2(G)}{\sigma_{\min}^A \eta^2 \rho} (\|x_{k+1} - x_k\|^2 + \|x_k - x_{k-1}\|^2) + \left( \frac{L}{2b_2} + \frac{18L^2}{\sigma_{\min}^A b_2 \rho} \right) \sum_{i=(n_k-1)q}^{k-1} \mathbb{E} \|x_{i+1} - x_i\|^2 + \frac{2\delta^2}{b_1 L} + \frac{72\delta^2}{\sigma_{\min}^A b_1 \rho} \\
 &\leq \Phi_k - \sigma_{\min}^H \sum_{j=1}^m \|y_j^k - y_j^{k+1}\|^2 - \left( \frac{\sigma_{\min}(G)}{\eta} + \frac{\rho\sigma_{\min}^A}{2} - L - \frac{6\sigma_{\max}^2(G)}{\sigma_{\min}^A \eta^2 \rho} - \frac{9L^2}{\sigma_{\min}^A \rho} - \frac{2L^2}{\sigma_{\min}^A \rho b_2} \right) \|x_{k+1} - x_k\|^2 \\
 &\quad + \left( \frac{L}{2b_2} + \frac{18L^2}{\sigma_{\min}^A b_2 \rho} \right) \sum_{i=(n_k-1)q}^{k-1} \mathbb{E} \|x_{i+1} - x_i\|^2 + \frac{2\delta^2}{b_1 L} + \frac{72\delta^2}{\sigma_{\min}^A b_1 \rho}, \tag{54}
 \end{aligned}$$

where the first inequality follows by the inequality (52) and the equality

$$\sum_{i=(n_k-1)q}^k \mathbb{E} \|x_{i+1} - x_i\|^2 = \sum_{i=(n_k-1)q}^{k-1} \mathbb{E} \|x_{i+1} - x_i\|^2 + \|x_{k+1} - x_k\|^2.$$

Since  $(n_k - 1)q \leq k \leq n_k q - 1$  and let  $(n_k - 1)q \leq l \leq n_k q - 1$ , then telescoping equality (54) over  $k$  from  $(n_k - 1)q$  to  $k$ , we have

$$\begin{aligned}
 \mathbb{E}[\Phi_{k+1}] &\leq \mathbb{E}[\Phi_{(n_k-1)q}] - \left( \frac{\sigma_{\min}(G)}{\eta} + \frac{\rho\sigma_{\min}^A}{2} - L - \frac{6\sigma_{\max}^2(G)}{\sigma_{\min}^A\eta^2\rho} - \frac{9L^2}{\sigma_{\min}^A\rho} - \frac{2L^2}{\sigma_{\min}^A\rho b_2} \right) \sum_{l=(n_k-1)q}^k \|x_{l+1} - x_l\|^2 \\
 &\quad - \sigma_{\min}^H \sum_{l=(n_k-1)q}^k \sum_{j=1}^m \|y_j^l - y_j^{l+1}\|^2 + \left( \frac{L}{2b_2} + \frac{18L^2}{\sigma_{\min}^A b_2 \rho} \right) \sum_{l=(n_k-1)q}^k \sum_{i=(n_k-1)q}^{k-1} \mathbb{E}\|x_{i+1} - x_i\|^2 + \frac{2\delta^2}{b_1 L} + \frac{72\delta^2}{\sigma_{\min}^A b_1 \rho} \\
 &\leq \mathbb{E}[\Phi_{(n_k-1)q}] - \left( \frac{\sigma_{\min}(G)}{\eta} + \frac{\rho\sigma_{\min}^A}{2} - L - \frac{6\sigma_{\max}^2(G)}{\sigma_{\min}^A\eta^2\rho} - \frac{9L^2}{\sigma_{\min}^A\rho} - \frac{2L^2}{\sigma_{\min}^A\rho b_2} \right) \sum_{i=(n_k-1)q}^k \|x_{i+1} - x_i\|^2 \\
 &\quad - \sigma_{\min}^H \sum_{i=(n_k-1)q}^k \sum_{j=1}^m \|y_j^i - y_j^{i+1}\|^2 + \left( \frac{Lq}{2b_2} + \frac{18L^2 q}{\sigma_{\min}^A b_2 \rho} \right) \sum_{i=(n_k-1)q}^k \mathbb{E}\|x_{i+1} - x_i\|^2 + \frac{2\delta^2}{b_1 L} + \frac{72\delta^2}{\sigma_{\min}^A b_1 \rho} \\
 &= \mathbb{E}[\Phi_{(n_k-1)q}] - \underbrace{\left( \frac{\sigma_{\min}(G)}{\eta} + \frac{\rho\sigma_{\min}^A}{2} - L - \frac{6\sigma_{\max}^2(G)}{\sigma_{\min}^A\eta^2\rho} - \frac{9L^2}{\sigma_{\min}^A\rho} - \frac{2L^2}{\sigma_{\min}^A\rho b_2} - \frac{Lq}{2b_2} - \frac{18L^2 q}{\sigma_{\min}^A b_2 \rho} \right)}_{\chi} \sum_{i=(n_k-1)q}^k \|x_{i+1} - x_i\|^2 \\
 &\quad - \sigma_{\min}^H \sum_{i=(n_k-1)q}^k \sum_{j=1}^m \|y_j^i - y_j^{i+1}\|^2 + \frac{2\delta^2}{b_1 L} + \frac{72\delta^2}{\sigma_{\min}^A b_1 \rho}, \tag{55}
 \end{aligned}$$

where the second inequality holds by the fact that

$$\sum_{l=(n_k-1)q}^k \sum_{i=(n_k-1)q}^{k-1} \mathbb{E}\|x_{i+1} - x_i\|^2 \leq \sum_{l=(n_k-1)q}^k \sum_{i=(n_k-1)q}^k \mathbb{E}\|x_{i+1} - x_i\|^2 \leq q \sum_{i=(n_k-1)q}^k \mathbb{E}\|x_{i+1} - x_i\|^2.$$

Since  $b_2 = q$ , we have

$$\begin{aligned}
 \chi &= \frac{\sigma_{\min}(G)}{\eta} + \frac{\rho\sigma_{\min}^A}{2} - L - \frac{6\sigma_{\max}^2(G)}{\sigma_{\min}^A\eta^2\rho} - \frac{9L^2}{\sigma_{\min}^A\rho} - \frac{2L^2}{\sigma_{\min}^A\rho b_2} - \frac{Lq}{2b_2} - \frac{18L^2 q}{\sigma_{\min}^A\rho b_2} \\
 &= \underbrace{\frac{\sigma_{\min}(G)}{\eta} - \frac{3L}{2}}_{L_1} + \underbrace{\frac{\rho\sigma_{\min}^A}{2} - \frac{6\sigma_{\max}^2(G)}{\sigma_{\min}^A\eta^2\rho} - \frac{27L^2}{\sigma_{\min}^A\rho} - \frac{2L^2}{\sigma_{\min}^A\rho}}_{L_2}. \tag{56}
 \end{aligned}$$

Given  $0 < \eta \leq \frac{2\sigma_{\min}(G)}{3L}$ , we have  $L_1 \geq 0$ . Further, let  $\eta = \frac{2\alpha\sigma_{\min}(G)}{3L}$  ( $0 < \alpha \leq 1$ ) and  $\rho = \frac{\sqrt{170}\kappa_G L}{\sigma_{\min}^A \alpha}$ , we have

$$\begin{aligned}
 L_2 &= \frac{\rho\sigma_{\min}^A}{2} - \frac{6\sigma_{\max}^2(G)}{\sigma_{\min}^A\eta^2\rho} - \frac{27L^2}{\sigma_{\min}^A\rho} - \frac{2L^2}{\sigma_{\min}^A\rho} \\
 &= \frac{\rho\sigma_{\min}^A}{2} - \frac{27\kappa_G^2 L^2}{2\sigma_{\min}^A\rho\alpha^2} - \frac{27L^2}{\sigma_{\min}^A\rho} - \frac{2L^2}{\sigma_{\min}^A\rho} \\
 &\geq \frac{\rho\sigma_{\min}^A}{2} - \frac{27\kappa_G^2 L^2}{2\sigma_{\min}^A\rho\alpha^2} - \frac{27\kappa_G^2 L^2}{\sigma_{\min}^A\rho\alpha^2} - \frac{2\kappa_G^2 L^2}{\sigma_{\min}^A\rho\alpha^2} \\
 &= \frac{\rho\sigma_{\min}^A}{4} + \underbrace{\frac{\rho\sigma_{\min}^A}{4} - \frac{85\kappa_G^2 L^2}{2\sigma_{\min}^A\rho\alpha^2}}_{\geq 0} \\
 &\geq \frac{\sqrt{170}\kappa_G L}{4\alpha}, \tag{57}
 \end{aligned}$$

where the first inequality follows by  $\kappa_G \geq 1$ ,  $\geq 1$  and  $0 < \alpha \leq 1$ ; and the second inequality holds by  $\rho = \frac{\sqrt{170}\kappa_G L}{\sigma_{\min}^A \alpha}$ . It follows that  $\chi \geq \frac{\sqrt{170}\kappa_G L}{4\alpha}$ .

Since  $\sigma_{\max}((A^T)^+)^T(A^T)^+ = \frac{1}{\sigma_{\min}^A}$ , using (10), we have

$$\begin{aligned}
 \mathcal{L}_\rho(x_{k+1}, y_{[m]}^{k+1}, z_{k+1}) &= f(x_{k+1}) + \sum_{j=1}^m g_j(y_j^{k+1}) - z_{k+1}^T(Ax_{k+1} + \sum_{j=1}^m B_j y_j^{k+1} - c) + \frac{\rho}{2} \|Ax_{k+1} + \sum_{j=1}^m B_j y_j^{k+1} - c\|^2 \\
 &= f(x_{k+1}) + \sum_{j=1}^m g_j(y_j^{k+1}) - \langle (A^T)^+(v_k + \frac{G}{\eta}(x_{k+1} - x_k)), Ax_{k+1} + \sum_{j=1}^m B_j y_j^{k+1} - c \rangle + \frac{\rho}{2} \|Ax_{k+1} + \sum_{j=1}^m B_j y_j^{k+1} - c\|^2 \\
 &= f(x_{k+1}) + \sum_{j=1}^m g_j(y_j^{k+1}) - \langle (A^T)^+(v_k - \nabla f(x_k) + \nabla f(x_k) + \frac{G}{\eta}(x_{k+1} - x_k)), Ax_{k+1} + \sum_{j=1}^m B_j y_j^{k+1} - c \rangle \\
 &\quad + \frac{\rho}{2} \|Ax_{k+1} + \sum_{j=1}^m B_j y_j^{k+1} - c\|^2 \\
 &\geq f(x_{k+1}) + \sum_{j=1}^m g_j(y_j^{k+1}) - \frac{2}{\sigma_{\min}^A \rho} \|v_k - \nabla f(x_k)\|^2 - \frac{2}{\sigma_{\min}^A \rho} \|\nabla f(x_k)\|^2 - \frac{2\sigma_{\max}^2(G)}{\sigma_{\min}^A \eta^2 \rho} \|x_{k+1} - x_k\|^2 \\
 &\quad + \frac{\rho}{8} \|Ax_{k+1} + \sum_{j=1}^m B_j y_j^{k+1} - c\|^2 \\
 &\geq f(x_{k+1}) + \sum_{j=1}^m g_j(y_j^{k+1}) - \frac{2L^2}{\sigma_{\min}^A b_2 \rho} \sum_{i=(n_k-1)q}^{k-1} \mathbb{E}\|x_{i+1} - x_i\|^2 - \frac{8\delta^2}{\sigma_{\min}^A b_1 \rho} - \frac{2\delta^2}{\sigma_{\min}^A \rho} - \frac{2\sigma_{\max}^2(G)}{\sigma_{\min}^A \eta^2 \rho} \|x_{k+1} - x_k\|^2
 \end{aligned} \tag{58}$$

where the first inequality is obtained by applying  $\langle a, b \rangle \leq \frac{1}{2\beta} \|a\|^2 + \frac{\beta}{2} \|b\|^2$  to the terms  $\langle (A^T)^+(v_k - \nabla f(x_k)), Ax_{k+1} + \sum_{j=1}^m B_j y_j^{k+1} - c \rangle$ ,  $\langle (A^T)^+ v_k, Ax_{k+1} + \sum_{j=1}^m B_j y_j^{k+1} - c \rangle$  and  $\langle (A^T)^+ \frac{G}{\eta}(x_{k+1} - x_k), Ax_{k+1} + \sum_{j=1}^m B_j y_j^{k+1} - c \rangle$  with  $\beta = \frac{\rho}{4}$ , respectively; and the second inequality follows by the inequality (6) and Assumption 3. Using the definition of  $\Phi_k$ , we have

$$\Phi_{k+1} \geq f^* + \sum_{j=1}^m g_j^* - \frac{2(4 + b_1)\delta^2}{\sigma_{\min}^A \rho b_1}, \quad \forall k = 0, 1, 2, \dots \tag{59}$$

It follows that the function  $\Phi_k$  is bounded from below. Let  $\Phi^*$  denotes a lower bound of function  $\Phi_k$ .

Further, telescoping equality (55) over  $k$  from 0 to  $K$ , we have

$$\begin{aligned}
 \mathbb{E}[\Phi_K] - \mathbb{E}[\Phi_0] &= (\mathbb{E}[\Phi_q] - \mathbb{E}[\Phi_0]) + (\mathbb{E}[\Phi_{2q}] - \mathbb{E}[\Phi_q]) + \dots + (\mathbb{E}[\Phi_K] - \mathbb{E}[\Phi_{(n_K-1)q}]) \\
 &\leq - \sum_{i=0}^{q-1} (\chi \|x_{i+1} - x_i\|^2 + \sigma_{\min}^H \sum_{j=1}^m \|y_j^i - y_j^{i+1}\|^2) - \sum_{i=q}^{2q-1} (\chi \|x_{i+1} - x_i\|^2 + \sigma_{\min}^H \sum_{j=1}^m \|y_j^i - y_j^{i+1}\|^2) \\
 &\quad - \dots - \sum_{i=(n_K-1)q}^{K-1} (\chi \|x_{i+1} - x_i\|^2 + \sigma_{\min}^H \sum_{j=1}^m \|y_j^i - y_j^{i+1}\|^2) + \frac{2K\delta^2}{b_1 L} + \frac{72K\delta^2}{\sigma_{\min}^A b_1 \rho} \\
 &= - \sum_{i=0}^{K-1} (\chi \|x_{i+1} - x_i\|^2 + \sigma_{\min}^H \sum_{j=1}^m \|y_j^i - y_j^{i+1}\|^2) + \frac{2K\delta^2}{b_1 L} + \frac{72K\delta^2}{\sigma_{\min}^A b_1 \rho}.
 \end{aligned} \tag{60}$$

Thus, the above inequality implies that

$$\frac{1}{K} \sum_{k=0}^{K-1} (\|x_{k+1} - x_k\|^2 + \sum_{j=1}^m \|y_j^k - y_j^{k+1}\|^2) \leq \frac{\mathbb{E}[\Phi_0] - \Phi^*}{K\gamma} + \frac{2\delta^2}{b_1 L \gamma} + \frac{72\delta^2}{\sigma_{\min}^A b_1 \rho \gamma}, \tag{61}$$

where  $\gamma = \min(\chi, \sigma_{\min}^H)$  and  $\chi \geq \frac{\sqrt{170\kappa_G L}}{4\alpha}$ .

□



**Theorem 2.** Suppose the sequence  $\{x_k, y_{[m]}^k, z_k\}_{k=1}^K$  is generated from Algorithm 2, and let  $b_2 = q = \sqrt{b_1}$ ,  $\eta = \frac{2\alpha\sigma_{\min}(G)}{3L}$  ( $0 < \alpha \leq 1$ ),  $\rho = \frac{\sqrt{170}\kappa_G L}{\sigma_{\min}^A \alpha}$ , and

$$\nu_1 = m(\rho^2\sigma_{\max}^B\sigma_{\max}^A + \rho^2(\sigma_{\max}^B)^2 + \sigma_{\max}^2(H)), \nu_2 = 3(L^2 + \frac{\sigma_{\max}^2(G)}{\eta^2}), \nu_3 = \frac{18L^2}{\sigma_{\min}^A\rho^2} + \frac{3\sigma_{\max}^2(G)}{\sigma_{\min}^A\eta^2\rho^2}, \quad (62)$$

then we have

$$\begin{aligned} \min_{1 \leq k \leq K} \mathbb{E}[\text{dist}(0, \partial L(x_k, y_{[m]}^k, z_k))^2] &\leq \frac{\nu_{\max}}{K} \sum_{k=1}^{K-1} \theta_k + \frac{w}{b_1} \\ &\leq \frac{3\nu_{\max}(\Phi_0 - \Phi^*)}{K\gamma} + \frac{6\nu_{\max}\delta^2}{b_1\gamma} \left(\frac{1}{L} + \frac{36}{\sigma_{\min}^A\rho}\right) + \frac{w}{b_1}, \end{aligned} \quad (63)$$

where  $w = 12\delta^2 \max\{1, \frac{6}{\sigma_{\min}^A\rho^2}\}$ ,  $\gamma = \min(\chi, \sigma_{\min}^H)$  with  $\chi \geq \frac{\sqrt{170}\kappa_G L}{4\alpha}$ ,  $\nu_{\max} = \max\{\nu_1, \nu_2, \nu_3\}$  and  $\Phi^*$  is a lower bound of the function  $\Phi_k$ . It implies that  $K$  and  $b_1$  satisfy

$$K = \frac{6\nu_{\max}(\Phi_0 - \Phi^*)}{\epsilon\gamma}, \quad b_1 = \frac{12\nu_{\max}\delta^2}{\epsilon\gamma} \left(\frac{1}{L} + \frac{36}{\sigma_{\min}^A\rho}\right) + \frac{2w}{\epsilon}$$

then  $(x_{k^*}, y_{[m]}^{k^*}, z_{k^*})$  is an  $\epsilon$ -approximate stationary point of (1), where  $k^* = \arg \min_k \theta_k$ .

*Proof.* First, we define an useful variable  $\theta_k = \mathbb{E}[\|x_{k+1} - x_k\|^2 + \|x_k - x_{k-1}\|^2 + \frac{1}{q} \sum_{i=(n_k-1)q}^k \|x_{i+1} - x_i\|^2 + \sum_{j=1}^m \|y_j^k - y_j^{k+1}\|^2]$ . By the optimal condition of the step 9 in Algorithm 2, we have, for all  $j \in [m]$

$$\begin{aligned} \mathbb{E}[\text{dist}(0, \partial_{y_j} L(x, y_{[m]}, z))^2]_{k+1} &= \mathbb{E}[\text{dist}(0, \partial g_j(y_j^{k+1}) - B_j^T z_{k+1})^2] \\ &= \|B_j^T z_k - \rho B_j^T (Ax_k + \sum_{i=1}^j B_i y_i^{k+1} + \sum_{i=j+1}^m B_i y_i^k - c) - H_j(y_j^{k+1} - y_j^k) - B_j^T z_{k+1}\|^2 \\ &= \|\rho B_j^T A(x_{k+1} - x_k) + \rho B_j^T \sum_{i=j+1}^m B_i (y_i^{k+1} - y_i^k) - H_j(y_j^{k+1} - y_j^k)\|^2 \\ &\leq m\rho^2\sigma_{\max}^{B_j}\sigma_{\max}^A \|x_{k+1} - x_k\|^2 + m\rho^2\sigma_{\max}^{B_j} \sum_{i=j+1}^m \sigma_{\max}^{B_i} \|y_i^{k+1} - y_i^k\|^2 + m\sigma_{\max}^2(H_j) \|y_j^{k+1} - y_j^k\|^2 \\ &\leq m(\rho^2\sigma_{\max}^B\sigma_{\max}^A + \rho^2(\sigma_{\max}^B)^2 + \sigma_{\max}^2(H))\theta_k, \end{aligned} \quad (64)$$

where the first inequality follows by the inequality  $\|\sum_{i=1}^r \alpha_i\|^2 \leq r \sum_{i=1}^r \|\alpha_i\|^2$ .

By the step 10 of Algorithm 2, we have

$$\begin{aligned} \mathbb{E}[\text{dist}(0, \nabla_x L(x, y_{[m]}, z))^2]_{k+1} &= \mathbb{E}\|A^T z_{k+1} - \nabla f(x_{k+1})\|^2 \\ &= \mathbb{E}\|v_k - \nabla f(x_{k+1}) - \frac{G}{\eta}(x_k - x_{k+1})\|^2 \\ &= \mathbb{E}\|v_k - \nabla f(x_k) + \nabla f(x_k) - \nabla f(x_{k+1}) - \frac{G}{\eta}(x_k - x_{k+1})\|^2 \\ &\leq \sum_{i=(n_k-1)q}^{k-1} \frac{3L^2}{b_2} \mathbb{E}\|x_{i+1} - x_i\|^2 + \frac{12\delta^2}{b_1} + 3(L^2 + \frac{\sigma_{\max}^2(G)}{\eta^2}) \|x_k - x_{k+1}\|^2 \\ &\leq 3(L^2 + \frac{\sigma_{\max}^2(G)}{\eta^2})\theta_k + \frac{12\delta^2}{b_1}, \end{aligned} \quad (65)$$

where the second inequality holds by  $b_2 = q$ .

By the step 11 of Algorithm 2, we have

$$\begin{aligned}
 \mathbb{E}[\text{dist}(0, \nabla_z L(x, y_{[m]}, z))]_{k+1}^2 &= \mathbb{E}\|Ax_{k+1} + \sum_{j=1}^m B_j y_j^{k+1} - c\|^2 \\
 &= \frac{1}{\rho^2} \mathbb{E}\|z_{k+1} - z_k\|^2 \\
 &\leq \frac{18L^2}{\sigma_{\min}^A b_2 \rho^2} \sum_{i=(n_k-1)q}^{k-1} \mathbb{E}\|x_{i+1} - x_i\|^2 + \left(\frac{9L^2}{\sigma_{\min}^A \rho^2} + \frac{3\sigma_{\max}^2(G)}{\sigma_{\min}^A \eta^2 \rho^2}\right) \|x_k - x_{k-1}\|^2 \\
 &\quad + \frac{3\sigma_{\max}^2(G)}{\sigma_{\min}^A \eta^2 \rho^2} \|x_{k+1} - x_k\|^2 + \frac{72\delta^2}{b_1 \sigma_{\min}^A \rho^2} \\
 &\leq \left(\frac{18L^2}{\sigma_{\min}^A \rho^2} + \frac{3\sigma_{\max}^2(G)}{\sigma_{\min}^A \eta^2 \rho^2}\right) \theta_k + \frac{72\delta^2}{b_1 \sigma_{\min}^A \rho^2}, \tag{66}
 \end{aligned}$$

where the second inequality holds by  $b_2 = q$ .

Let

$$\nu_1 = m(\rho^2 \sigma_{\max}^B \sigma_{\max}^A + \rho^2 (\sigma_{\max}^B)^2 + \sigma_{\max}^2(H)), \quad \nu_2 = 3(L^2 + \frac{\sigma_{\max}^2(G)}{\eta^2}), \quad \nu_3 = \frac{18L^2}{\sigma_{\min}^A \rho^2} + \frac{3\sigma_{\max}^2(G)}{\sigma_{\min}^A \eta^2 \rho^2}. \tag{67}$$

By (61), we have

$$\frac{1}{K} \sum_{k=0}^{K-1} (\|x_{k+1} - x_k\|^2 + \sum_{j=1}^m \|y_j^k - y_j^{k+1}\|^2) \leq \frac{\mathbb{E}[\Phi_0] - \Phi^*}{K\gamma} + \frac{2\delta^2}{b_1 L \gamma} + \frac{72\delta^2}{\sigma_{\min}^A b_1 \rho \gamma}, \tag{68}$$

where  $\gamma = \min(\chi, \sigma_{\min}^H)$  and  $\chi \geq \frac{\sqrt{170}\kappa_G L}{4\alpha}$ . Since

$$\sum_{k=0}^{K-1} \sum_{i=(n_k-1)q}^k \|x_{i+1} - x_i\|^2 \leq q \sum_{k=0}^{K-1} \|x_{k+1} - x_k\|^2, \tag{69}$$

by (64), (65) and (66), we have

$$\begin{aligned}
 \min_{1 \leq k \leq K} \mathbb{E}[\text{dist}(0, \partial L(x_k, y_{[m]}^k, z_k))]^2 &\leq \frac{\nu_{\max}}{K} \sum_{k=1}^{K-1} \theta_k + \max\left\{\frac{12\delta^2}{b_1}, \frac{72\delta^2}{b_1 \sigma_{\min}^A \rho^2}\right\} \\
 &\leq \frac{3\nu_{\max}(\Phi_0 - \Phi^*)}{K\gamma} + \frac{6\nu_{\max}\delta^2}{b_1 \gamma} \left(\frac{1}{L} + \frac{36}{\sigma_{\min}^A \rho}\right) + \max\left\{\frac{12\delta^2}{b_1}, \frac{72\delta^2}{b_1 \sigma_{\min}^A \rho^2}\right\}, \tag{70}
 \end{aligned}$$

where  $\gamma = \min(\chi, \sigma_{\min}^H)$  with  $\chi \geq \frac{\sqrt{170}\kappa_G L}{4\alpha}$  and  $\nu_{\max} = \max\{\nu_1, \nu_2, \nu_3\}$ .

Given  $\eta = \frac{2\alpha\sigma_{\min}(G)}{3L}$  ( $0 < \alpha \leq 1$ ) and  $\rho = \frac{\sqrt{170}\kappa_G L}{\sigma_{\min}^A \alpha}$ , since  $m$  is relatively small, it easy verifies that  $\gamma = O(1)$  and  $\nu_{\max} = O(1)$ , which are independent on  $b_1$  and  $K$ . Thus, we obtain

$$\min_{1 \leq k \leq K} \mathbb{E}[\text{dist}(0, \partial L(x_k, y_{[m]}^k, z_k))]^2 \leq O\left(\frac{1}{K}\right) + O\left(\frac{1}{b_1}\right). \tag{71}$$

□

### 2.3. Theoretical Analysis of Non-convex SVRG-ADMM Algorithm

In this subsection, we first extend the existing nonconvex SVRG-ADMM (Huang et al., 2016; Zheng & Kwok, 2016) to the multi-blocks setting for solving the problem (1), which is summarized in Algorithm 3. Then we study the convergence analysis of this non-convex SVRG-ADMM.

---

#### Algorithm 3 Nonconvex SVRG-ADMM Algorithm

---

- 1: **Input:**  $b, T, M, S = \lceil T/M \rceil, \eta > 0$  and  $\rho > 0$ ;
  - 2: **Initialize:**  $x_0^1 = \tilde{x}^1, z_0^1$ , and  $y_j^{0,1}$  for  $j \in [m]$ ;
  - 3: **for**  $s = 1, 2, \dots, S$  **do**
  - 4:    $\nabla f(\tilde{x}^s) = \frac{1}{n} \sum_{i=1}^n \nabla f_i(\tilde{x}^s)$ ;
  - 5:   **for**  $t = 0, 1, \dots, M - 1$  **do**
  - 6:     Uniformly random pick a mini-batch  $\mathcal{I}_t$  (with replacement) from  $\{1, 2, \dots, n\}$  with  $|\mathcal{I}_t| = b$ , and compute
 
$$v_t^s = \nabla f_{\mathcal{I}_t}(x_t^s) - \nabla f_{\mathcal{I}_t}(\tilde{x}^s) + \nabla f(\tilde{x}^s);$$
  - 7:      $y_j^{s,t+1} = \arg \min_{y_j} \{ \mathcal{L}_\rho(x_t^s, y_{[j-1]}^{s,t+1}, y_j, y_{[j+1:m]}^{s,t}, z_t) + \frac{1}{2} \|y_j - y_j^{s,t}\|_{H_j}^2 \}$  with  $H_j \succ 0$  for all  $j \in [m]$ ;
  - 8:      $x_{t+1}^s = \arg \min_x \hat{\mathcal{L}}_\rho(x, y_{[m]}^{s,t+1}, z_t^s, v_t^s)$ ;
  - 9:      $z_{t+1}^s = z_t^s - \rho(Ax_{t+1}^s + \sum_{j=1}^m B_j y_j^{s,t+1} - c)$ ;
  - 10:   **end for**
  - 11:    $\tilde{x}^{s+1} = x_0^{s+1} = x_M^s, y_j^{s+1,0} = y_j^{s,M}$  for all  $j \in [m], z_0^{s+1} = z_M^s$ ;
  - 12: **end for**
  - 13: **Output:**  $\{x, y_{[m]}, z\}$  chosen uniformly random from  $\{(x_t^s, y_{[m]}^{s,t}, z_t^s)_{t=1}^M\}_{s=1}^S$ .
- 

In Algorithm 3, we give

$$\begin{aligned} \hat{\mathcal{L}}_\rho(x, y_{[m]}^{s,t+1}, z_t^s, v_t^s) &= f(x_t) + (v_t^s)^T (x - x_t^s) + \frac{1}{2\eta} \|x - x_t^s\|_G^2 + \sum_{j=1}^m g_j(y_j^{s,t+1}) \\ &\quad - (z_t^s)^T (Ax + \sum_{j=1}^m B_j y_j^{s,t+1} - c) + \frac{\rho}{2} \|Ax + \sum_{j=1}^m B_j y_j^{s,t+1} - c\|^2, \end{aligned} \quad (72)$$

where  $\eta > 0$  and  $G \succ 0$ .

**Lemma 6.** Suppose the sequence  $\{(x_t^s, y_{[m]}^{s,t}, z_t^s)_{t=1}^M\}_{s=1}^S$  is generated by Algorithm 3. The following inequality holds

$$\begin{aligned} \mathbb{E} \|z_{t+1}^s - z_t^s\|^2 &\leq \frac{9L^2}{\sigma_{\min}^A b} (\|x_t^s - \tilde{x}^s\|^2 + \|x_{t-1}^s - \tilde{x}^s\|^2) + \frac{3\sigma_{\max}^2(G)}{\sigma_{\min}^A \eta^2} \mathbb{E} \|x_{t+1}^s - x_t^s\|^2 \\ &\quad + \left( \frac{3\sigma_{\max}^2(G)}{\sigma_{\min}^A \eta^2} + \frac{9L^2}{\sigma_{\min}^A} \right) \mathbb{E} \|x_t^s - x_{t-1}^s\|^2. \end{aligned} \quad (73)$$

*Proof.* Using the optimal condition for the step 8 of Algorithm 3, we have

$$v_t^s + \frac{1}{\eta} G(x_{t+1}^s - x_t^s) - A^T z_t^s + \rho A^T (Ax_{t+1}^s + \sum_{j=1}^m B_j y_j^{s,t+1} - c) = 0, \quad (74)$$

By the step 10 of Algorithm 3, we have

$$A^T z_{t+1}^s = v_t^s + \frac{1}{\eta} G(x_{t+1}^s - x_t^s). \quad (75)$$

It follows that

$$z_{t+1}^s = (A^T)^+ (v_t^s + \frac{G}{\eta} (x_{t+1}^s - x_t^s)), \quad (76)$$

where  $(A^T)^+$  is the pseudoinverse of  $A^T$ . By Assumption 4, *i.e.*,  $A$  is a full column matrix, we have  $(A^T)^+ = A(A^T A)^{-1}$ . Using (76), then we have

$$\begin{aligned} \mathbb{E}\|z_{t+1}^s - z_t^s\|^2 &= \mathbb{E}\|(A^T)^+(v_t^s + \frac{G}{\eta}(x_{t+1}^s - x_t^s) - v_{t-1}^s - \frac{G}{\eta}(x_t^s - x_{t-1}^s))\|^2 \\ &\leq \frac{1}{\sigma_{\min}^A} [3\mathbb{E}\|v_t^s - v_{t-1}^s\|^2 + \frac{3\sigma_{\max}^2(G)}{\eta^2} \mathbb{E}\|x_{t+1}^s - x_t^s\|^2 + \frac{3\sigma_{\max}^2(G)}{\eta^2} \mathbb{E}\|x_t^s - x_{t-1}^s\|^2]. \end{aligned} \quad (77)$$

Next, considering the upper bound of  $\|v_t^s - v_{t-1}^s\|^2$ , we have

$$\begin{aligned} \mathbb{E}\|v_t^s - v_{t-1}^s\|^2 &= \mathbb{E}\|v_t^s - \nabla f(x_t^s) + \nabla f(x_t^s) - \nabla f(x_{t-1}^s) + \nabla f(x_{t-1}^s) - v_{t-1}^s\|^2 \\ &\leq 3\mathbb{E}\|v_t^s - \nabla f(x_t^s)\|^2 + 3\mathbb{E}\|\nabla f(x_t^s) - \nabla f(x_{t-1}^s)\|^2 + 3\mathbb{E}\|\nabla f(x_{t-1}^s) - v_{t-1}^s\|^2 \\ &\leq \frac{3L^2}{b} \|x_t^s - \tilde{x}^s\|^2 + \frac{3L^2}{b} \|x_{t-1}^s - \tilde{x}^s\|^2 + 3L^2 \mathbb{E}\|x_t^s - x_{t-1}^s\|^2, \end{aligned} \quad (78)$$

where the second inequality holds by Lemma 3 of (Reddi et al., 2016) and Assumption 1. Finally, combining (77) with (78), we obtain the above result.  $\square$

**Lemma 7.** Suppose the sequence  $\{(x_t^s, y_{[m]}^{s,t}, z_t^s)_{t=1}^M\}_{s=1}^S$  is generated from Algorithm 3, and define a Lyapunov function:

$$\Gamma_t^s = \mathbb{E}[\mathcal{L}_\rho(x_t^s, y_{[m]}^{s,t}, z_t^s) + (\frac{3\sigma_{\max}^2(G)}{\sigma_{\min}^A \eta^2 \rho} + \frac{9L^2}{\sigma_{\min}^A \rho}) \|x_t^s - x_{t-1}^s\|^2 + \frac{9L^2}{\sigma_{\min}^A \rho b} \|x_{t-1}^s - \tilde{x}^s\|^2 + c_t \|x_t^s - \tilde{x}^s\|^2], \quad (79)$$

where the positive sequence  $\{c_t\}$  satisfies, for  $s = 1, 2, \dots, S$

$$c_t = \begin{cases} \frac{18L^2}{\sigma_{\min}^A \rho b} + \frac{L}{b} + (1 + \beta)c_{t+1}, & 1 \leq t \leq M, \\ 0, & t \geq M + 1. \end{cases}$$

Let  $M = \lceil n^{\frac{1}{3}} \rceil$ ,  $b = \lceil n^{\frac{2}{3}} \rceil$ ,  $\eta = \frac{\alpha \sigma_{\min}(G)}{5L}$  ( $0 < \alpha \leq 1$ ) and  $\rho = \frac{2\sqrt{231}\kappa_G L}{\sigma_{\min}^A \alpha}$ , we have

$$\frac{1}{T} \sum_{s=1}^S \sum_{t=0}^{M-1} (\sigma_{\min}^H \sum_{j=1}^m \|y_j^{s,t} - y_j^{s,t+1}\|^2 + \frac{L}{2b} \|x_t^s - \tilde{x}^s\|_2^2 + \chi_t \|x_{t+1}^s - x_t^s\|^2) \leq \frac{\Gamma_0^1 - \Gamma^*}{T}. \quad (80)$$

where  $\Gamma^*$  denotes a lower bound of  $\Gamma_t^s$  and  $\chi_t \geq \frac{\sqrt{231}\kappa_G L}{2\alpha} > 0$ .

*Proof.* By the optimal condition of step 7 in Algorithm 3, we have, for  $j \in [m]$

$$\begin{aligned}
 0 &= (y_j^{s,t} - y_j^{s,t+1})^T (\partial g_j(y_j^{s,t+1}) - B_j^T z_t^s + \rho B_j^T (Ax_t^s + \sum_{i=1}^j B_i y_i^{s,t+1} + \sum_{i=j+1}^m B_i y_i^{s,t} - c) + H_j (y_j^{s,t+1} - y_j^{s,t})) \\
 &\leq g_j(y_j^{s,t}) - g_j(y_j^{s,t+1}) - (z_t^s)^T (B_j y_j^{s,t} - B_j y_j^{s,t+1}) + \rho (B_j y_j^{s,t} - B_j y_j^{s,t+1})^T (Ax_t^s + \sum_{i=1}^j B_i y_i^{s,t+1} + \sum_{i=j+1}^m B_i y_i^{s,t} - c) \\
 &\quad - \|y_j^{s,t+1} - y_j^{s,t}\|_{H_j}^2 \\
 &= g_j(y_j^{s,t}) - g_j(y_j^{s,t+1}) - (z_t^s)^T (Ax_t^s + \sum_{i=1}^{j-1} B_i y_i^{s,t+1} + \sum_{i=j}^m B_i y_i^{s,t} - c) + (z_t^s)^T (Ax_t^s + \sum_{i=1}^j B_i y_i^{s,t+1} + \sum_{i=j+1}^m B_i y_i^{s,t} - c) \\
 &\quad + \frac{\rho}{2} \|Ax_t^s + \sum_{i=1}^{j-1} B_i y_i^{s,t+1} + \sum_{i=j}^m B_i y_i^{s,t} - c\|^2 - \frac{\rho}{2} \|Ax_t^s + \sum_{i=1}^j B_i y_i^{s,t+1} + \sum_{i=j+1}^m B_i y_i^{s,t} - c\|^2 - \|y_j^{s,t+1} - y_j^{s,t}\|_{H_j}^2 \\
 &\quad - \frac{\rho}{2} \|B_j y_j^{s,t} - B_j y_j^{s,t+1}\|^2 \\
 &= \underbrace{f(x_t^s) + \sum_{i=1}^{j-1} g_i(y_i^{s,t+1}) + \sum_{i=j}^m g_i(y_i^{s,t}) - (z_t^s)^T (Ax_t^s + \sum_{i=1}^{j-1} B_i y_i^{s,t+1} + \sum_{i=j}^m B_i y_i^{s,t} - c) + \frac{\rho}{2} \|Ax_t^s + \sum_{i=1}^{j-1} B_i y_i^{s,t+1} + \sum_{i=j}^m B_i y_i^{s,t} - c\|^2}_{\mathcal{L}_\rho(x_t^s, y_{[j-1]}^{s,t+1}, y_{[j:m]}^{s,t}, z_t^s)} \\
 &\quad - \underbrace{(f(x_t^s) + \sum_{i=1}^j g_i(y_i^{s,t+1}) + \sum_{i=j+1}^m g_i(y_i^{s,t}) - (z_t^s)^T (Ax_t^s + \sum_{i=1}^j B_i y_i^{s,t+1} + \sum_{i=j+1}^m B_i y_i^{s,t} - c) + \frac{\rho}{2} \|Ax_t^s + \sum_{i=1}^j B_i y_i^{s,t+1} + \sum_{i=j+1}^m B_i y_i^{s,t} - c\|^2)}_{\mathcal{L}_\rho(x_t^s, y_{[j]}^{s,t+1}, y_{[j+1:m]}^{s,t}, z_t^s)} \\
 &\quad - \|y_j^{s,t+1} - y_j^{s,t}\|_{H_j}^2 - \frac{\rho}{2} \|B_j y_j^{s,t} - B_j y_j^{s,t+1}\|^2 \\
 &\leq \mathcal{L}_\rho(x_t^s, y_{[j-1]}^{s,t+1}, y_{[j:m]}^{s,t}, z_t^s) - \mathcal{L}_\rho(x_t^s, y_{[j]}^{s,t+1}, y_{[j+1:m]}^{s,t}, z_t^s) - \sigma_{\min}(H_j) \|y_j^{s,t} - y_j^{s,t+1}\|^2, \tag{81}
 \end{aligned}$$

where the first inequality holds by the convexity of function  $g_j(y)$ , and the second equality follows by applying the equality  $(a - b)^T b = \frac{1}{2}(\|a\|^2 - \|b\|^2 - \|a - b\|^2)$  on the term  $(B_j y_j^{s,t} - B_j y_j^{s,t+1})^T (Ax_t^s + \sum_{i=1}^j B_i y_i^{s,t+1} + \sum_{i=j+1}^m B_i y_i^{s,t} - c)$ . Thus, we have, for all  $j \in [m]$

$$\mathcal{L}_\rho(x_t^s, y_{[j]}^{s,t+1}, y_{[j+1:m]}^{s,t}, z_t^s) \leq \mathcal{L}_\rho(x_t^s, y_{[j-1]}^{s,t+1}, y_{[j:m]}^{s,t}, z_t^s) - \sigma_{\min}(H_j) \|y_j^{s,t} - y_j^{s,t+1}\|^2. \tag{82}$$

Telescoping inequality (82) over  $j$  from 1 to  $m$ , we obtain

$$\mathcal{L}_\rho(x_t^s, y_{[m]}^{s,t+1}, z_t^s) \leq \mathcal{L}_\rho(x_t^s, y_{[m]}^{s,t}, z_t^s) - \sigma_{\min}^H \sum_{j=1}^m \|y_j^{s,t} - y_j^{s,t+1}\|^2, \tag{83}$$

where  $\sigma_{\min}^H = \min_{j \in [m]} \sigma_{\min}(H_j)$ .

By Assumption 1, we have

$$0 \leq f(x_t^s) - f(x_{t+1}^s) + \nabla f(x_t^s)^T (x_{t+1}^s - x_t^s) + \frac{L}{2} \|x_{t+1}^s - x_t^s\|^2. \tag{84}$$

Using optimal condition of the step 8 in Algorithm 3, we have

$$0 = (x_t^s - x_{t+1}^s)^T (v_t^s - A^T z_t^s + \rho A^T (Ax_{t+1}^s + \sum_{j=1}^m B_j y_j^{s,t+1} - c) + \frac{G}{\eta} (x_{t+1}^s - x_t^s)). \tag{85}$$

Combining (84) and (85), we have

$$\begin{aligned}
 0 &\leq f(x_t^s) - f(x_{t+1}^s) + \nabla f(x_t^s)^T(x_{t+1}^s - x_t^s) + \frac{L}{2}\|x_{t+1}^s - x_t^s\|^2 \\
 &\quad + (x_t^s - x_{t+1}^s)^T(v_t^s - A^T z_t^s + \rho A^T(Ax_{t+1}^s + \sum_{j=1}^m B_j y_j^{s,t+1} - c) + \frac{G}{\eta}(x_{t+1}^s - x_t^s)) \\
 &= f(x_t^s) - f(x_{t+1}^s) + \frac{L}{2}\|x_t^s - x_{t+1}^s\|^2 - \frac{1}{\eta}\|x_t^s - x_{t+1}^s\|_G^2 + (x_t^s - x_{t+1}^s)^T(v_t^s - \nabla f(x_t^s)) \\
 &\quad - (z_t^s)^T(Ax_t^s - Ax_{t+1}^s) + \rho(Ax_t^s - Ax_{t+1}^s)^T(Ax_{t+1}^s + \sum_{j=1}^m B_j y_j^{s,t+1} - c) \\
 &\stackrel{(i)}{=} f(x_t^s) - f(x_{t+1}^s) + \frac{L}{2}\|x_t^s - x_{t+1}^s\|^2 - \frac{1}{\eta}\|x_t^s - x_{t+1}^s\|_G^2 + (x_t^s - x_{t+1}^s)^T(v_t^s - \nabla f(x_t^s)) - (z_t^s)^T(Ax_t^s + \sum_{j=1}^m B_j y_j^{s,t+1} - c) \\
 &\quad + (z_t^s)^T(Ax_{t+1}^s + \sum_{j=1}^m B_j y_j^{s,t+1} - c) + \frac{\rho}{2}(\|Ax_t^s + \sum_{j=1}^m B_j y_j^{s,t+1} - c\|^2 - \|Ax_{t+1}^s + \sum_{j=1}^m B_j y_j^{s,t+1} - c\|^2 - \|Ax_t^s - Ax_{t+1}^s\|^2) \\
 &= f(x_t^s) + \underbrace{\sum_{j=1}^m g_j(y_j^{s,t+1}) - (z_t^s)^T(Ax_t^s + \sum_{j=1}^m B_j y_j^{s,t+1} - c) + \frac{\rho}{2}\|Ax_t^s + \sum_{j=1}^m B_j y_j^{s,t+1} - c\|^2}_{\mathcal{L}_\rho(x_t^s, y_{[m]}^{s,t+1}, z_t^s)} \\
 &\quad - \underbrace{(f(x_{t+1}^s) + \sum_{j=1}^m g_j(y_j^{s,t+1}) - (z_t^s)^T(Ax_{t+1}^s + \sum_{j=1}^m B_j y_j^{s,t+1} - c) + \frac{\rho}{2}\|Ax_{t+1}^s + \sum_{j=1}^m B_j y_j^{s,t+1} - c\|^2)}_{\mathcal{L}_\rho(x_{t+1}^s, y_{[m]}^{s,t+1}, z_t^s)} \\
 &\quad + \frac{L}{2}\|x_t^s - x_{t+1}^s\|^2 + (x_t^s - x_{t+1}^s)^T(v_t^s - \nabla f(x_t^s)) - \frac{1}{\eta}\|x_t^s - x_{t+1}^s\|_G^2 - \frac{\rho}{2}\|Ax_t^s - Ax_{t+1}^s\|^2 \\
 &\leq \mathcal{L}_\rho(x_t^s, y_{[m]}^{s,t+1}, z_t^s) - \mathcal{L}_\rho(x_{t+1}^s, y_{[m]}^{s,t+1}, z_t^s) - \left(\frac{\sigma_{\min}(G)}{\eta} + \frac{\rho\sigma_{\min}^A}{2} - \frac{L}{2}\right)\|x_t^s - x_{t+1}^s\|^2 + (x_t^s - x_{t+1}^s)^T(v_t^s - \nabla f(x_t^s)) \\
 &\stackrel{(ii)}{\leq} \mathcal{L}_\rho(x_t^s, y_{[m]}^{s,t+1}, z_t^s) - \mathcal{L}_\rho(x_{t+1}^s, y_{[m]}^{s,t+1}, z_t^s) - \left(\frac{\sigma_{\min}(G)}{\eta} + \frac{\rho\sigma_{\min}^A}{2} - L\right)\|x_t^s - x_{t+1}^s\|^2 + \frac{1}{2L}\|v_t^s - \nabla f(x_t^s)\|^2 \\
 &\stackrel{(iii)}{\leq} \mathcal{L}_\rho(x_t^s, y_{[m]}^{s,t+1}, z_t^s) - \mathcal{L}_\rho(x_{t+1}^s, y_{[m]}^{s,t+1}, z_t^s) - \left(\frac{\sigma_{\min}(G)}{\eta} + \frac{\rho\sigma_{\min}^A}{2} - L\right)\|x_t^s - x_{t+1}^s\|^2 + \frac{L}{2b}\|x_t^s - \tilde{x}^s\|^2, \tag{86}
 \end{aligned}$$

where the equality (i) holds by applying the equality  $(a - b)^T b = \frac{1}{2}(\|a\|^2 - \|b\|^2 - \|a - b\|^2)$  on the term  $(Ax_t^s - Ax_{t+1}^s)^T(Ax_{t+1}^s + \sum_{j=1}^m B_j y_j^{s,t+1} - c)$ , the inequality (ii) holds by the inequality  $a^T b \leq \frac{L}{2}\|a\|^2 + \frac{1}{2L}\|b\|^2$ , and the inequality (iii) holds by Lemma 3 of (Reddi et al., 2016). Thus, we obtain

$$\mathcal{L}_\rho(x_{t+1}^s, y_{[m]}^{s,t+1}, z_t^s) \leq \mathcal{L}_\rho(x_t^s, y_{[m]}^{s,t+1}, z_t^s) - \left(\frac{\sigma_{\min}(G)}{\eta} + \frac{\rho\sigma_{\min}^A}{2} - L\right)\|x_t^s - x_{t+1}^s\|^2 + \frac{L}{2b}\|x_t^s - \tilde{x}^s\|^2. \tag{87}$$

By the step 9 in Algorithm 3, we have

$$\begin{aligned}
 \mathcal{L}_\rho(x_{t+1}^s, y_{[m]}^{s,t+1}, z_{t+1}^s) - \mathcal{L}_\rho(x_{t+1}^s, y_{[m]}^{s,t+1}, z_t^s) &= \frac{1}{\rho}\|z_{t+1}^s - z_t^s\|^2 \\
 &\leq \frac{9L^2}{\sigma_{\min}^A b \rho} (\|x_t^s - \tilde{x}^s\|^2 + \|x_{t-1}^s - \tilde{x}^s\|^2) + \frac{3\sigma_{\max}^2(G)}{\sigma_{\min}^A \eta^2 \rho} \|x_{t+1}^s - x_t^s\|^2 \\
 &\quad + \left(\frac{3\sigma_{\max}^2(G)}{\sigma_{\min}^A \eta^2 \rho} + \frac{9L^2}{\sigma_{\min}^A \rho}\right) \|x_t^s - x_{t-1}^s\|^2, \tag{88}
 \end{aligned}$$

where the first inequality follows by Lemma 6.

Combining (83), (87) and (88), we have

$$\begin{aligned}
 \mathcal{L}_\rho(x_{t+1}^s, y_{[m]}^{s,t+1}, z_{t+1}^s) &\leq \mathcal{L}_\rho(x_t^s, y_{[m]}^{s,t}, z_t^s) - \sigma_{\min}^H \sum_{j=1}^m \|y_j^{s,t} - y_j^{s,t+1}\|^2 - \left(\frac{\sigma_{\min}(G)}{\eta} + \frac{\rho\sigma_{\min}^A}{2} - L\right) \|x_t^s - x_{t+1}^s\|^2 \\
 &\quad + \frac{L}{2b} \|x_t^s - \tilde{x}^s\|^2 + \frac{9L^2}{\sigma_{\min}^A b \rho} (\|x_t^s - \tilde{x}^s\|^2 + \|x_{t-1}^s - \tilde{x}^s\|^2) + \frac{3\sigma_{\max}^2(G)}{\sigma_{\min}^A \eta^2 \rho} \|x_{t+1}^s - x_t^s\|^2 \\
 &\quad + \left(\frac{3\sigma_{\max}^2(G)}{\sigma_{\min}^A \eta^2 \rho} + \frac{9L^2}{\sigma_{\min}^A \rho}\right) \|x_t^s - x_{t-1}^s\|^2. \tag{89}
 \end{aligned}$$

Next, we define a *Lyapunov* function  $\Gamma_t^s$  as follows:

$$\Gamma_t^s = \mathbb{E}[\mathcal{L}_\rho(x_t^s, y_{[m]}^{s,t}, z_t^s) + \left(\frac{3\sigma_{\max}^2(G)}{\sigma_{\min}^A \eta^2 \rho} + \frac{9L^2}{\sigma_{\min}^A \rho}\right) \|x_t^s - x_{t-1}^s\|^2 + \frac{9L^2}{\sigma_{\min}^A b \rho} \|x_{t-1}^s - \tilde{x}^s\|^2 + c_t \|x_t^s - \tilde{x}^s\|^2]. \tag{90}$$

Considering the upper bound of  $\|x_{t+1}^s - \tilde{x}^s\|^2$ , we have

$$\begin{aligned}
 \|x_{t+1}^s - \tilde{x}^s\|^2 &= \|x_{t+1}^s - x_t^s + x_t^s - \tilde{x}^s\|^2 = \|x_{t+1}^s - x_t^s\|^2 + 2(x_{t+1}^s - x_t^s)^T (x_t^s - \tilde{x}^s) + \|x_t^s - \tilde{x}^s\|^2 \\
 &\leq \|x_{t+1}^s - x_t^s\|^2 + 2\left(\frac{1}{2\beta} \|x_{t+1}^s - x_t^s\|^2 + \frac{\beta}{2} \|x_t^s - \tilde{x}^s\|^2\right) + \|x_t^s - \tilde{x}^s\|^2 \\
 &= (1 + 1/\beta) \|x_{t+1}^s - x_t^s\|^2 + (1 + \beta) \|x_t^s - \tilde{x}^s\|^2, \tag{91}
 \end{aligned}$$

where the above inequality holds by the Cauchy-Schwarz inequality with  $\beta > 0$ . Using (89), we have

$$\begin{aligned}
 \Gamma_{t+1}^s &= \mathbb{E}[\mathcal{L}_\rho(x_{t+1}^s, y_{[m]}^{s,t+1}, z_{t+1}^s) + \left(\frac{3\sigma_{\max}^2(G)}{\sigma_{\min}^A \eta^2 \rho} + \frac{9L^2}{\sigma_{\min}^A \rho}\right) \|x_{t+1}^s - x_t^s\|^2 + \frac{9L^2}{\sigma_{\min}^A b \rho} \|x_t^s - \tilde{x}^s\|^2 + c_{t+1} \|x_{t+1}^s - \tilde{x}^s\|^2] \\
 &\leq \mathcal{L}_\rho(x_t^s, y_{[m]}^{s,t}, z_t^s) + \left(\frac{3\sigma_{\max}^2(G)}{\sigma_{\min}^A \eta^2 \rho} + \frac{9L^2}{\sigma_{\min}^A \rho}\right) \|x_t^s - x_{t-1}^s\|^2 + \frac{9L^2}{\sigma_{\min}^A b \rho} \|x_{t-1}^s - \tilde{x}^s\|^2 + \left(\frac{18L^2}{\sigma_{\min}^A \rho b} + \frac{L}{b} + (1 + \beta)c_{t+1}\right) \|x_t^s - \tilde{x}^s\|^2 \\
 &\quad - \left(\frac{\sigma_{\min}(G)}{\eta} + \frac{\rho\sigma_{\min}^A}{2} - L - \frac{6\sigma_{\max}^2(G)}{\sigma_{\min}^A \eta^2 \rho} - \frac{9L^2}{\sigma_{\min}^A \rho} - (1 + 1/\beta)c_{t+1}\right) \|x_t^s - x_{t+1}^s\|^2 \\
 &\quad - \sigma_{\min}^H \sum_{j=1}^m \|y_j^{s,t} - y_j^{s,t+1}\|^2 - \frac{L}{2b} \|x_t^s - \tilde{x}^s\|^2 \\
 &\leq \Gamma_t^s - \chi_t \|x_t^s - x_{t+1}^s\|^2 - \sigma_{\min}^H \sum_{j=1}^m \|y_j^{s,t} - y_j^{s,t+1}\|^2 - \frac{L}{2b} \|x_t^s - \tilde{x}^s\|^2, \tag{92}
 \end{aligned}$$

where  $c_t = \frac{18L^2}{\sigma_{\min}^A \rho b} + \frac{L}{b} + (1 + \beta)c_{t+1}$  and  $\chi_t = \frac{\sigma_{\min}(G)}{\eta} + \frac{\rho\sigma_{\min}^A}{2} - L - \frac{6\sigma_{\max}^2(G)}{\sigma_{\min}^A \eta^2 \rho} - \frac{9L^2}{\sigma_{\min}^A \rho} - (1 + 1/\beta)c_{t+1}$ .

Next, we will prove the relationship between  $\Gamma_1^{s+1}$  and  $\Gamma_M^s$ . Since  $x_0^{s+1} = x_M^s = \tilde{x}^{s+1}$ , we have

$$v_0^{s+1} = \nabla f_{\mathcal{I}}(x_0^{s+1}) - \nabla f_{\mathcal{I}}(x_0^{s+1}) + \nabla f(x_0^{s+1}) = \nabla f(x_0^{s+1}) = \nabla f(x_M^s). \tag{93}$$

Thus, we obtain

$$\begin{aligned}
 \mathbb{E}\|v_0^{s+1} - v_M^s\|^2 &= \mathbb{E}\|\nabla f(x_M^s) - \nabla f_{\mathcal{I}}(x_M^s) + \nabla f_{\mathcal{I}}(\tilde{x}^s) - \nabla f(\tilde{x}^s)\|^2 \\
 &= \|\nabla f_{\mathcal{I}}(x_M^s) - \nabla f_{\mathcal{I}}(\tilde{x}^s) - \mathbb{E}_{\mathcal{I}}[\nabla f_{\mathcal{I}}(x_M^s) - \nabla f_{\mathcal{I}}(\tilde{x}^s)]\|^2 \\
 &\leq \frac{1}{bn} \sum_{i=1}^n \mathbb{E}\|\nabla f_i(x_M^s) - \nabla f_i(\tilde{x}^s)\|^2 \\
 &\leq \frac{L^2}{b} \|x_M^s - \tilde{x}^s\|^2. \tag{94}
 \end{aligned}$$

By the step 9 of Algorithm 3, we have

$$\begin{aligned}
 \|z_1^{s+1} - z_M^s\|^2 &\leq \frac{1}{\sigma_{\min}^A} \|v_0^{s+1} - v_M^s + \frac{G}{\eta}(x_1^{s+1} - x_0^{s+1}) + \frac{G}{\eta}(x_M^s - x_{M-1}^s)\|^2 \\
 &= \frac{1}{\sigma_{\min}^A} \|\nabla f(x_M^s) - v_M^s + \frac{G}{\eta}(x_1^{s+1} - x_M^s) + \frac{G}{\eta}(x_M^s - x_{M-1}^s)\|^2 \\
 &\leq \frac{1}{\sigma_{\min}^A} (3\|\nabla f(x_M^s) - v_M^s\|^2 + \frac{3\sigma_{\max}^2(G)}{\eta^2} \|x_1^{s+1} - x_M^s\|^2 + \frac{3\sigma_{\max}^2(G)}{\eta^2} \|x_M^s - x_{M-1}^s\|^2) \\
 &\leq \frac{1}{\sigma_{\min}^A} \left( \frac{3L^2}{b} \|x_M^s - \tilde{x}^s\|_2^2 + \frac{3\sigma_{\max}^2(G)}{\eta^2} \|x_1^{s+1} - x_M^s\|^2 + \frac{3\sigma_{\max}^2(G)}{\eta^2} \|x_M^s - x_{M-1}^s\|^2 \right). \quad (95)
 \end{aligned}$$

Since  $x_M^s = x_0^{s+1}$ ,  $y_j^{s,M} = y_j^{s+1,0}$  for all  $j \in [m]$  and  $z_M^s = z_0^{s+1}$ , using (83), we have

$$\mathcal{L}_\rho(x_0^{s+1}, y_{[m]}^{s+1,1}, z_0^{s+1}) \leq \mathcal{L}_\rho(x_M^s, y_{[m]}^{s,M}, z_M^s) - \sigma_{\min}^H \sum_{j=1}^m \|y_j^{s,M} - y_j^{s+1,1}\|^2. \quad (96)$$

By (87), we have

$$\mathcal{L}_\rho(x_1^{s+1}, y_{[m]}^{s+1,1}, z_0^{s+1}) \leq \mathcal{L}_\rho(x_0^{s+1}, y_{[m]}^{s+1,1}, z_0^{s+1}) - \left( \frac{\sigma_{\min}(G)}{\eta} + \frac{\rho\sigma_{\min}^A}{2} - L \right) \|x_0^{s+1} - x_1^{s+1}\|^2. \quad (97)$$

By (88), we have

$$\begin{aligned}
 \mathcal{L}_\rho(x_1^{s+1}, y_{[m]}^{s+1,1}, z_1^{s+1}) &\leq \mathcal{L}_\rho(x_1^{s+1}, y_{[m]}^{s+1,1}, z_0^{s+1}) + \frac{1}{\rho} \|z_1^{s+1} - z_0^{s+1}\|^2 \\
 &\leq \mathcal{L}_\rho(x_1^{s+1}, y_{[m]}^{s+1,1}, z_0^{s+1}) + \frac{1}{\sigma_{\min}^A \rho} \left( \frac{3L^2}{b} \|x_M^s - \tilde{x}^s\|_2^2 + \frac{3\sigma_{\max}^2(G)}{\eta^2} \|x_1^{s+1} - x_M^s\|^2 \right. \\
 &\quad \left. + \frac{3\sigma_{\max}^2(G)}{\eta^2} \|x_M^s - x_{M-1}^s\|^2 \right). \quad (98)
 \end{aligned}$$

where the second inequality holds by the inequality (95).

Combining (96), (97) with (98), we have

$$\begin{aligned}
 \mathcal{L}_\rho(x_1^{s+1}, y_{[m]}^{s+1,1}, z_1^{s+1}) &\leq \mathcal{L}_\rho(x_M^s, y_{[m]}^{s,M}, z_M^s) - \sigma_{\min}^H \sum_{j=1}^m \|y_j^{s,M} - y_j^{s+1,1}\|^2 - \left( \frac{\sigma_{\min}(G)}{\eta} + \frac{\rho\sigma_{\min}^A}{2} - L \right) \|x_0^{s+1} - x_1^{s+1}\|^2 + \\
 &\quad \frac{1}{\sigma_{\min}^A \rho} \left( \frac{3L^2 d}{b} \|x_M^s - \tilde{x}^s\|_2^2 + \frac{3\sigma_{\max}^2(G)}{\eta^2} \|x_1^{s+1} - x_M^s\|^2 + \frac{3\sigma_{\max}^2(G)}{\eta^2} \|x_M^s - x_{M-1}^s\|^2 \right). \quad (99)
 \end{aligned}$$



Therefore, we have

$$\begin{aligned}
 \Gamma_1^{s+1} &= \mathbb{E}[\mathcal{L}_\rho(x_1^{s+1}, y_{[m]}^{s+1,1}, z_1^{s+1}) + (\frac{3\sigma_{\max}^2(G)}{\sigma_{\min}^A \eta^2 \rho} + \frac{9L^2}{\sigma_{\min}^A \rho}) \|x_1^{s+1} - x_0^{s+1}\|^2 + \frac{9L^2}{\sigma_{\min}^A b \rho} \|x_0^{s+1} - \tilde{x}^{s+1}\|^2 + c_1 \|x_1^{s+1} - \tilde{x}^{s+1}\|^2] \\
 &= \mathcal{L}_\rho(x_1^{s+1}, y_{[m]}^{s+1,1}, z_1^{s+1}) + (\frac{3\sigma_{\max}^2(G)}{\sigma_{\min}^A \eta^2 \rho} + \frac{9L^2}{\sigma_{\min}^A \rho} + c_1) \|x_1^{s+1} - x_0^{s+1}\|^2 \\
 &\leq \mathcal{L}_\rho(x_M^s, y_{[m]}^{s,M}, z_M^s) + (\frac{3\sigma_{\max}^2(G)}{\sigma_{\min}^A \eta^2 \rho} + \frac{9L^2}{\sigma_{\min}^A \rho}) \|x_M^s - x_{M-1}^s\|^2 + \frac{9L^2}{\sigma_{\min}^A \rho b} \|x_{M-1}^s - \tilde{x}^s\|_2^2 + (\frac{18L^2}{\sigma_{\min}^A \rho b} + \frac{L}{b}) \|x_M^s - \tilde{x}^s\|_2^2 \\
 &\quad - \sigma_{\min}^H \sum_{j=1}^m \|y_j^{s,M} - y_j^{s+1,1}\|^2 - (\frac{\sigma_{\min}(G)}{\eta} + \frac{\rho\sigma_{\min}^A}{2} - L - \frac{6\sigma_{\max}^2(G)}{\sigma_{\min}^A \eta^2 \rho} - \frac{9L^2}{\sigma_{\min}^A \rho} - c_1) \|x_1^{s+1} - x_M^s\|_2^2 \\
 &\quad - \frac{9L^2}{\sigma_{\min}^A \rho} \|x_M^s - x_{M-1}^s\|_2^2 - \frac{9L^2}{\sigma_{\min}^A \rho b} \|x_{M-1}^s - \tilde{x}^s\|_2^2 - (\frac{15L^2}{\sigma_{\min}^A \rho b} + \frac{L}{b}) \|x_M^s - \tilde{x}^s\|_2^2 \\
 &\leq \Gamma_M^s - \sigma_{\min}^H \sum_{j=1}^m \|y_j^{s,M} - y_j^{s+1,1}\|^2 - \frac{L}{2b} \|x_M^s - \tilde{x}^s\|_2^2 - (\frac{\sigma_{\min}(G)}{\eta} + \frac{\rho\sigma_{\min}^A}{2} - L - \frac{6\sigma_{\max}^2(G)}{\sigma_{\min}^A \eta^2 \rho} - \frac{9L^2}{\sigma_{\min}^A \rho} - c_1) \|x_1^{s+1} - x_M^s\|_2^2 \\
 &= \Gamma_M^s - \sigma_{\min}^H \sum_{j=1}^m \|y_j^{s,M} - y_j^{s+1,1}\|^2 - \frac{L}{2b} \|x_M^s - \tilde{x}^s\|_2^2 - \chi_M \|x_1^{s+1} - x_M^s\|_2^2, \tag{100}
 \end{aligned}$$

where  $c_M = \frac{18L^2}{\sigma_{\min}^A \rho b} + \frac{L}{b}$ , and  $\chi_M = \frac{\sigma_{\min}(G)}{\eta} + \frac{\rho\sigma_{\min}^A}{2} - L - \frac{6\sigma_{\max}^2(G)}{\sigma_{\min}^A \eta^2 \rho} - \frac{9L^2}{\sigma_{\min}^A \rho} - c_1$ .

Let  $c_{M+1} = 0$  and  $\beta = \frac{1}{M}$ , recursing on  $t$ , we have

$$\begin{aligned}
 c_{t+1} &= (\frac{18L^2}{\sigma_{\min}^A \rho b} + \frac{L}{b}) \frac{(1+\beta)^{M-t} - 1}{\beta} = \frac{M}{b} (\frac{18L^2}{\sigma_{\min}^A \rho} + L) ((1 + \frac{1}{M})^{M-t} - 1) \\
 &\leq \frac{M}{b} (\frac{18L^2}{\sigma_{\min}^A \rho} + L) (e - 1) \leq \frac{2M}{b} (\frac{18L^2}{\sigma_{\min}^A \rho} + L). \tag{101}
 \end{aligned}$$

where the first inequality holds by  $(1 + \frac{1}{M})^M$  is an increasing function and  $\lim_{M \rightarrow \infty} (1 + \frac{1}{M})^M = e$ . It follows that, for  $t = 1, 2, \dots, M$

$$\begin{aligned}
 \chi_t &\geq \frac{\sigma_{\min}(G)}{\eta} + \frac{\rho\sigma_{\min}^A}{2} - L - \frac{6\sigma_{\max}^2(G)}{\sigma_{\min}^A \eta^2 \rho} - \frac{9L^2}{\sigma_{\min}^A \rho} - (1 + 1/\beta) \frac{2M}{b} (\frac{18L^2}{\sigma_{\min}^A \rho} + L) \\
 &= \frac{\sigma_{\min}(G)}{\eta} + \frac{\rho\sigma_{\min}^A}{2} - L - \frac{6\sigma_{\max}^2(G)}{\sigma_{\min}^A \eta^2 \rho} - \frac{9L^2}{\sigma_{\min}^A \rho} - (1 + M) \frac{2M}{b} (\frac{18L^2}{\sigma_{\min}^A \rho} + L) \\
 &\geq \frac{\sigma_{\min}(G)}{\eta} + \frac{\rho\sigma_{\min}^A}{2} - L - \frac{6\sigma_{\max}^2(G)}{\sigma_{\min}^A \eta^2 \rho} - \frac{9L^2}{\sigma_{\min}^A \rho} - \frac{4M^2}{b} (\frac{18L^2}{\sigma_{\min}^A \rho} + L) \\
 &= \underbrace{\frac{\sigma_{\min}(G)}{\eta} - L - \frac{4M^2 L}{b}}_{Q_1} + \underbrace{\frac{\rho\sigma_{\min}^A}{2} - \frac{6\sigma_{\max}^2(G)}{\sigma_{\min}^A \eta^2 \rho} - \frac{9L^2}{\sigma_{\min}^A \rho} - \frac{72M^2 L^2}{b\sigma_{\min}^A \rho}}_{Q_2}. \tag{102}
 \end{aligned}$$

Let  $M = \lceil n^{\frac{1}{3}} \rceil$ ,  $b = \lceil n^{\frac{2}{3}} \rceil$  and  $0 < \eta \leq \frac{\sigma_{\min}(G)}{5L}$ , we have  $Q_1 \geq 0$ . Further, set  $\eta = \frac{\alpha\sigma_{\min}(G)}{5L}$  ( $0 < \alpha \leq 1$ ) and

$\rho = \frac{2\sqrt{231}\kappa_G L}{\sigma_{\min}^A \alpha}$ , we have

$$\begin{aligned}
 Q_2 &= \frac{\rho\sigma_{\min}^A}{2} - \frac{6\sigma_{\max}^2(G)}{\sigma_{\min}^A \eta^2 \rho} - \frac{9L^2}{\sigma_{\min}^A \rho} - \frac{72M^2 L^2}{b\sigma_{\min}^A \rho} \\
 &= \frac{\rho\sigma_{\min}^A}{2} - \frac{150\kappa_G^2 L^2}{\sigma_{\min}^A \rho \alpha^2} - \frac{9L^2}{\sigma_{\min}^A \rho} - \frac{72L^2}{\sigma_{\min}^A \rho} \\
 &\geq \frac{\rho\sigma_{\min}^A}{2} - \frac{150\kappa_G^2 L^2}{\sigma_{\min}^A \rho \alpha^2} - \frac{9\kappa_G^2 L^2}{\sigma_{\min}^A \rho \alpha^2} - \frac{72\kappa_G^2 L^2}{\sigma_{\min}^A \rho \alpha^2} \\
 &= \frac{\rho\sigma_{\min}^A}{4} + \underbrace{\frac{\rho\sigma_{\min}^A}{4} - \frac{231\kappa_G^2 L^2}{\sigma_{\min}^A \rho \alpha^2}}_{\geq 0} \\
 &\geq \frac{\sqrt{231}\kappa_G L}{2\alpha} > 0
 \end{aligned}$$

where  $\kappa_G = \frac{\sigma_{\max}(G)}{\sigma_{\min}(G)} \geq 1$ . Thus, we have  $\chi_t \geq \frac{\sqrt{231}\kappa_G L}{2\alpha} > 0$  for all  $t$ .

Since  $\frac{L}{2b} > 0$  and  $\chi_t > 0$ , by (92) and (100), the function  $\Gamma_t^s$  is monotone decreasing. By the definition of function  $\Gamma_t^s$ , we have

$$\begin{aligned}
 \Gamma_t^s &\geq \mathbb{E}[\mathcal{L}_\rho(x_t^s, y_{[m]}^{s,t}, z_t^s)] \\
 &= f(x_t^s) + \sum_{j=1}^m g(y_j^{s,t}) - (z_t^s)^T (Ax_t^s + \sum_{j=1}^m B_j y_j^{s,t} - c) + \frac{\rho}{2} \|Ax_t^s + \sum_{j=1}^m B_j y_j^{s,t} - c\|^2 \\
 &= f(x_t^s) + \sum_{j=1}^m g(y_j^{s,t}) - \frac{1}{\rho} (z_t^s)^T (z_{t-1}^s - z_t^s) + \frac{1}{2\rho} \|z_t^s - z_{t-1}^s\|^2 \\
 &= f(x_t^s) + \sum_{j=1}^m g(y_j^{s,t}) - \frac{1}{2\rho} \|z_{t-1}^s\|^2 + \frac{1}{2\rho} \|z_t^s\|^2 + \frac{1}{\rho} \|z_t^s - z_{t-1}^s\|^2 \\
 &\geq f^* + \sum_{j=1}^m g_j^* - \frac{1}{2\rho} \|z_{t-1}^s\|^2 + \frac{1}{2\rho} \|z_t^s\|^2.
 \end{aligned} \tag{103}$$

Summing the inequality (105) over  $t = 0, 1, \dots, M$  and  $s = 1, 2, \dots, S$ , we have

$$\frac{1}{T} \sum_{s=1}^S \sum_{t=0}^M \Gamma_t^s \geq f^* + \sum_{j=1}^m g_j^* - \frac{1}{2\rho} \|z_0^1\|^2. \tag{104}$$

Thus, the function  $\Gamma_t^s$  is bounded from below. Let  $\Gamma^*$  denote a lower bound of  $\Gamma_t^s$ .

Finally, telescoping (92) and (100) over  $t$  from 0 to  $M - 1$  and over  $s$  from 1 to  $S$ , we have

$$\frac{1}{T} \sum_{s=1}^S \sum_{t=0}^{M-1} (\sigma_{\min}^H \sum_{j=1}^m \|y_j^{s,t} - y_j^{s,t+1}\|^2 + \frac{L}{2b} \|x_t^s - \tilde{x}^s\|_2^2 + \chi_t \|x_t^s - x_{t+1}^s\|^2) \leq \frac{\Gamma_0^1 - \Gamma^*}{T}. \tag{105}$$

where  $T = MS$  and  $\chi_t \geq \frac{\sqrt{231}\kappa_G L}{2\alpha} > 0$ .

**Theorem 3.** Suppose the sequence  $\{(x_t^s, y_{[m]}^{s,t}, z_t^s)\}_{t=1}^M\}_{s=1}^S$  is generated from Algorithm 3, and let  $\eta = \frac{\alpha\sigma_{\min}(G)}{5L}$  ( $0 < \alpha \leq 1$ ),  $\rho = \frac{2\sqrt{231}\kappa_G L}{\sigma_{\min}^A \alpha}$  and

$$\nu_1 = m(\rho^2 \sigma_{\max}^B \sigma_{\max}^A + \rho^2 (\sigma_{\max}^B)^2 + \sigma_{\max}^2(H)), \nu_2 = 3L^2 + \frac{3\sigma_{\max}^2(G)}{\eta^2}, \nu_3 = \frac{9L^2}{\sigma_{\min}^A \rho^2} + \frac{3\sigma_{\max}^2(G)}{\sigma_{\min}^A \eta^2 \rho^2}.$$

then we have

$$\min_{s,t} \mathbb{E} [\text{dist}(0, \partial L(x_t^s, y_{[m]}^{s,t}, z_t^s))^2] \leq \frac{\nu_{\max}}{T} \sum_{s=1}^S \sum_{t=0}^{M-1} \theta_t^s \leq \frac{2\nu_{\max}(\Gamma_0^1 - \Gamma^*)}{\gamma T}$$

where  $\gamma = \min(\sigma_{\min}^H, \frac{L}{2}, \chi_t)$ ,  $\nu_{\max} = \max(\nu_1, \nu_2, \nu_3)$  and  $\Gamma^*$  is a lower bound of function  $\Gamma_t^s$ . It implies that the whole iteration number  $T = MS$  satisfies

$$T = \frac{2\nu_{\max}(\Gamma_0^1 - \Gamma^*)}{\epsilon\gamma},$$

then  $(x_{t^*}^{s^*}, y_{[m]}^{s^*, t^*}, z_{t^*}^{s^*})$  is an  $\epsilon$ -approximate stationary point of (1), where  $(t^*, s^*) = \arg \min_{t,s} \theta_t^s$ .

*Proof.* We begin with defining an useful variable  $\theta_t^s = \mathbb{E}[\|x_{t+1}^s - x_t^s\|^2 + \|x_t^s - x_{t-1}^s\|^2 + \frac{1}{b}(\|x_t^s - \tilde{x}^s\|^2 + \|x_{t-1}^s - \tilde{x}^s\|^2) + \sum_{j=1}^m \|y_j^{s,t} - y_j^{s,t+1}\|^2]$ . By the step 7 of Algorithm 3, we have, for all  $j \in [m]$

$$\begin{aligned} \mathbb{E}[\text{dist}(0, \partial_{y_j} L(x, y_{[m]}, z))^2]_{s,t+1} &= \mathbb{E}[\text{dist}(0, \partial g_j(y_j^{s,t+1}) - B_j^T z_{t+1}^s)^2] \\ &= \|B_j^T z_t^s - \rho B_j^T (Ax_t^s + \sum_{i=1}^j B_i y_i^{s,t+1} + \sum_{i=j+1}^m B_i y_i^{s,t} - c) - H_j(y_j^{s,t+1} - y_j^{s,t}) - B_j^T z_{t+1}^s\|^2 \\ &= \|\rho B_j^T A(x_{t+1}^s - x_t^s) + \rho B_j^T \sum_{i=j+1}^m B_i (y_i^{s,t+1} - y_i^{s,t}) - H_j(y_j^{s,t+1} - y_j^{s,t})\|^2 \\ &\leq m\rho^2 \sigma_{\max}^{B_j} \sigma_{\max}^A \|x_{t+1}^s - x_t^s\|^2 + m\rho^2 \sigma_{\max}^{B_j} \sum_{i=j+1}^m \sigma_{\max}^{B_i} \|y_i^{s,t+1} - y_i^{s,t}\|^2 \\ &\quad + m\sigma_{\max}^2(H_j) \|y_j^{s,t+1} - y_j^{s,t}\|^2 \\ &\leq m(\rho^2 \sigma_{\max}^{B_j} \sigma_{\max}^A + \rho^2 (\sigma_{\max}^{B_j})^2 + \sigma_{\max}^2(H_j)) \theta_t^s, \end{aligned} \tag{106}$$

where the first inequality follows by the inequality  $\|\frac{1}{n} \sum_{i=1}^n z_i\|^2 \leq \frac{1}{n} \sum_{i=1}^n \|z_i\|^2$ .

By the step 8 of Algorithm 3, we have

$$\begin{aligned} \mathbb{E}[\text{dist}(0, \nabla_x L(x, y, z))]_{s,t+1} &= \mathbb{E}\|A^T z_{t+1}^s - \nabla f(x_{t+1}^s)\|^2 \\ &= \mathbb{E}\|v_t^s - \nabla f(x_{t+1}^s) - \frac{G}{\eta}(x_t^s - x_{t+1}^s)\|^2 \\ &= \mathbb{E}\|v_t^s - \nabla f(x_t^s) + \nabla f(x_t^s) - \nabla f(x_{t+1}^s) - \frac{G}{\eta}(x_t^s - x_{t+1}^s)\|^2 \\ &\leq \frac{3L^2}{b} \|x_t^s - \tilde{x}^s\|^2 + 3(L^2 + \frac{\sigma_{\max}^2(G)}{\eta^2}) \|x_t^s - x_{t+1}^s\|^2 \\ &\leq (3L^2 + \frac{3\sigma_{\max}^2(G)}{\eta^2}) \theta_t^s. \end{aligned} \tag{107}$$

By the step 9 of Algorithm 3, we have

$$\begin{aligned}
 \mathbb{E}[\text{dist}(0, \nabla_z L(x, y, z))]_{s,t+1} &= \mathbb{E}\|Ax_{t+1}^s + By_{t+1}^s - c\|^2 \\
 &= \frac{1}{\rho^2} \mathbb{E}\|z_{t+1}^s - z_t^s\|^2 \\
 &\leq \frac{9L^2}{\sigma_{\min}^A \rho^2 b} (\|x_t^s - \tilde{x}^s\|^2 + \|x_{t-1}^s - \tilde{x}^s\|^2) + \frac{3\sigma_{\max}^2(G)}{\sigma_{\min}^A \eta^2 \rho^2} \|x_{t+1}^s - x_t^s\|^2 \\
 &\quad + \frac{3(\sigma_{\max}^2(G) + 3L^2 \eta^2)}{\sigma_{\min}^A \eta^2 \rho^2} \|x_t^s - x_{t-1}^s\|^2 \\
 &\leq \left( \frac{9L^2}{\sigma_{\min}^A \rho^2} + \frac{3\sigma_{\max}^2(G)}{\sigma_{\min}^A \eta^2 \rho^2} \right) \theta_t^s.
 \end{aligned} \tag{108}$$

Let

$$\nu_1 = m(\rho^2 \sigma_{\max}^B \sigma_{\max}^A + \rho^2 (\sigma_{\max}^B)^2 + \sigma_{\max}^2(H)), \quad \nu_2 = 3L^2 + \frac{3\sigma_{\max}^2(G)}{\eta^2}, \quad \nu_3 = \frac{9L^2}{\sigma_{\min}^A \rho^2} + \frac{3\sigma_{\max}^2(G)}{\sigma_{\min}^A \eta^2 \rho^2}.$$

Using (105), (106), (107) and (108), we have

$$\min_{s,t} \mathbb{E}[\text{dist}(0, \partial L(x_t^s, y_{[m]}^{s,t}, z_t^s))^2] \leq \frac{\nu_{\max}}{T} \sum_{s=1}^S \sum_{t=0}^{M-1} \theta_t^s \leq \frac{2\nu_{\max}(\Gamma_0^1 - \Gamma^*)}{\gamma T}, \tag{109}$$

where  $\gamma = \min(\sigma_{\min}^H, \frac{L}{2}, \chi_t)$  with  $\chi_t \geq \frac{\sqrt{231}\kappa_G L}{2\alpha} > 0$  and  $\nu_{\max} = \max(\nu_1, \nu_2, \nu_3)$ .

Given  $\eta = \frac{\alpha \sigma_{\min}(G)}{5L}$  ( $0 < \alpha \leq 1$ ) and  $\rho = \frac{2\sqrt{231}\kappa_G L}{\sigma_{\min}^A \alpha}$ , since  $m$  is relatively small, it easy verifies that  $\nu_{\max} = O(1)$  and  $\gamma = O(1)$ , which are independent on  $n$  and  $T$ . Thus, we obtain

$$\min_{t,s} \mathbb{E}[\text{dist}(0, \partial L(x_t^s, y_{[m]}^{s,t}, z_t^s))^2] \leq O\left(\frac{1}{T}\right). \tag{110}$$

□

#### 2.4. Theoretical Analysis of Non-convex SAGA-ADMM Algorithm

In the subsection, we first extend the existing nonconvex SAGA-ADM (Huang et al., 2016) to the multi-blocks setting for solving the problem (1), which is summarized in Algorithm 4. Then we study the convergence analysis of this non-convex SAGA-ADMM.

---

**Algorithm 4** Nonconvex SAGA-ADMM Algorithm
 

---

- 1: **Input:**  $b, T, \eta > 0, \rho > 0$ ;
- 2: **Initialize:**  $x_0, u_i^0 = x_0$  for  $i \in \{1, 2, \dots, n\}$ ,  $\phi_0 = \frac{1}{n} \sum_{i=1}^n \nabla f_i(u_i^0)$ , and  $y_j^0$  for  $j \in [m]$ ;
- 3: **for**  $t = 0, 1, \dots, T - 1$  **do**
- 4: Uniformly random pick a mini-batch  $\mathcal{I}_t$  (with replacement) from  $\{1, 2, \dots, n\}$  with  $|\mathcal{I}_t| = b$ , and compute

$$v_t = \frac{1}{b} \sum_{i_t \in \mathcal{I}_t} (\nabla f_{i_t}(x_t) - \nabla f_{i_t}(u_{i_t}^t)) + \phi_t$$

- with  $\phi_t = \frac{1}{n} \sum_{i=1}^n \nabla f_i(u_i^t)$ ;
- 5:  $y_j^{t+1} = \arg \min_{y_j} \{ \mathcal{L}_\rho(x_t, y_{[j-1]}^{t+1}, y_j, y_{[j+1:m]}^t, z_t) + \frac{1}{2} \|y_j - y_j^t\|_{H_j}^2 \}$  with  $H_j \succ 0$  for all  $j \in [m]$ ;
  - 6:  $x_{t+1} = \arg \min_x \hat{\mathcal{L}}_\rho(x, y_{[m]}^{t+1}, z_t, v_t)$ ;
  - 7:  $z_{t+1} = z_t - \rho(Ax_{t+1} + \sum_{j=1}^m B_j y_j^{t+1} - c)$ ;
  - 8:  $u_{i_t}^{t+1} = x_{t+1}$  for  $i_t \in \mathcal{I}_t$  and  $u_i^{t+1} = u_i^t$  for  $i \notin \mathcal{I}_t$ ;
  - 9:  $\phi_{t+1} = \phi_t - \frac{1}{n} \sum_{i_t \in \mathcal{I}_t} (\nabla f_{i_t}(u_{i_t}^t) - \nabla f_{i_t}(u_{i_t}^{t+1}))$ ;
  - 10: **end for**
  - 11: **Output:**  $\{x, y_{[m]}, z\}$  chosen uniformly random from  $\{x_t, y_{[m]}^t, z_t\}_{t=1}^T$ .
- 

In Algorithm 4, we give

$$\begin{aligned} \hat{\mathcal{L}}_\rho(x, y_{[m]}^{t+1}, z_t, v_t) &= f(x_t) + v_t^T(x - x_t) + \frac{1}{2\eta} \|x - x_t\|_G^2 + \sum_{j=1}^m g_j(y_j^{t+1}) \\ &\quad - z_t^T(Ax + \sum_{j=1}^m B_j y_j^{t+1} - c) + \frac{\rho}{2} \|Ax + \sum_{j=1}^m B_j y_j^{t+1} - c\|^2, \end{aligned} \quad (111)$$

where  $\eta > 0$  and  $G \succ 0$ .

**Lemma 8.** Suppose the sequence  $\{x_t, y_{[m]}^t, z_t\}_{t=1}^T$  is generated by Algorithm 4. The following inequality holds

$$\begin{aligned} \mathbb{E} \|z_{t+1} - z_t\|^2 &\leq \frac{9L^2}{\sigma_{\min}^A b n} \sum_{i=1}^n (\|x_t - u_i^t\|^2 + \|x_{t-1} - u_i^{t-1}\|^2) + \frac{3\sigma_{\max}^2(G)}{\sigma_{\min}^A \eta^2} \mathbb{E} \|x_{t+1} - x_t\|^2 \\ &\quad + \frac{3(\sigma_{\max}^2(G) + 3L^2\eta^2)}{\sigma_{\min}^A \eta^2} \mathbb{E} \|x_t - x_{t-1}\|^2. \end{aligned} \quad (112)$$

*Proof.* By the optimize condition of the the step 6 in Algorithm 4, we have

$$v_t + \frac{1}{\eta} G(x_{t+1} - x_t) - A^T z_t + \rho A^T(Ax_{t+1} + \sum_{j=1}^m B_j y_j^{t+1} - c) = 0. \quad (113)$$

Using the step 7 of Algorithm 4, then we have

$$A^T z_{t+1} = v_t + \frac{G}{\eta} (x_{t+1} - x_t). \quad (114)$$

It follows that

$$z_{t+1} = (A^T)^+(v_t + \frac{G}{\eta} (x_{t+1} - x_t)), \quad (115)$$

where  $(A^T)^+$  is the pseudoinverse of  $A^T$ . Since  $A$  is a full column matrix, we have  $(A^T)^+ = A(A^T A)^{-1}$ . Using (115), then we have

$$\begin{aligned} \mathbb{E}\|z_{t+1} - z_t\|^2 &= \mathbb{E}\|(A^T)^+(v_t + \frac{G}{\eta}(x_{t+1} - x_t) - v_{t-1} + \frac{G}{\eta}(x_t - x_{t-1}))\|^2 \\ &\leq \frac{1}{\sigma_{\min}^A} [3\mathbb{E}\|v_t - v_{t-1}\|^2 + \frac{3\sigma_{\max}^2(G)}{\eta^2} \mathbb{E}\|x_{t+1} - x_t\|^2 + \frac{3\sigma_{\max}^2(G)}{\eta^2} \mathbb{E}\|x_t - x_{t-1}\|^2]. \end{aligned} \quad (116)$$

Next, considering the upper bound of  $\|v_t - v_{t-1}\|^2$ , we have

$$\begin{aligned} \mathbb{E}\|v_t - v_{t-1}\|^2 &= \mathbb{E}\|v_t - \nabla f(x_t) + \nabla f(x_t) - \nabla f(x_{t-1}) + \nabla f(x_{t-1}) - v_{t-1}\|^2 \\ &\leq 3\mathbb{E}\|v_t - \nabla f(x_t)\|^2 + 3\mathbb{E}\|\nabla f(x_t) - \nabla f(x_{t-1})\|^2 + 3\mathbb{E}\|\nabla f(x_{t-1}) - v_{t-1}\|^2 \\ &\leq \frac{3L^2}{b} \frac{1}{n} \sum_{i=1}^n (\|x_t - u_i^t\|^2 + \|x_{t-1} - u_i^{t-1}\|^2) + 3L^2 \mathbb{E}\|x_t - x_{t-1}\|^2, \end{aligned} \quad (117)$$

where the second inequality holds by lemma 4 of (Reddi et al., 2016) and Assumption 1. Finally, combining the inequalities (116) with (117), we can obtain the above result.  $\square$

**Lemma 9.** Suppose the sequence  $\{x_t, y_{[m]}^t, z_t\}_{t=1}^T$  is generated from Algorithm 4, and define a Lyapunov function

$$\Omega_t = \mathbb{E}[\mathcal{L}_\rho(x_t, y_{[m]}^t, z_t)] + \left(\frac{3\sigma_{\max}^2(G)}{\sigma_{\min}^A \rho \eta^2} + \frac{9L^2}{\sigma_{\min}^A \rho}\right) \|x_t - x_{t-1}\|^2 + \frac{9L^2}{\sigma_{\min}^A \rho b} \frac{1}{n} \sum_{i=1}^n \|x_{t-1} - u_i^{t-1}\|^2 + c_t \frac{1}{n} \sum_{i=1}^n \|x_t - u_i^t\|^2,$$

where the positive sequence  $\{c_t\}$  satisfies

$$c_t = \begin{cases} \frac{18L^2}{\sigma_{\min}^A \rho b} + \frac{L}{b} + (1-p)(1+\beta)c_{t+1}, & 0 \leq t \leq T-1, \\ 0, & t \geq T, \end{cases}$$

where  $p$  denotes probability of an index  $i$  being in  $\mathcal{I}_t$ . Further, let  $b = \lceil n^{\frac{2}{3}} \rceil$ ,  $\eta = \frac{\alpha \sigma_{\min}(G)}{17L}$  ( $0 < \alpha \leq 1$ ) and  $\rho = \frac{2\sqrt{2031}\kappa_G}{\sigma_{\min}^A \alpha}$  we have

$$\frac{1}{T} \sum_{t=1}^T (\sigma_{\min}^H \sum_{j=1}^m \|y_j^t - y_j^{t+1}\|^2 + \chi_t \|x_t - x_{t+1}\|^2 + \frac{L}{2b} \frac{1}{n} \sum_{i=1}^n \|x_t - u_i^t\|^2) \leq \frac{\Omega_0 - \Omega^*}{T}, \quad (118)$$

where  $\chi_t \geq \frac{\sqrt{2031}\kappa_G L}{2\alpha} > 0$  and  $\Omega^*$  denotes a lower bound of  $\Omega_t$ .

*Proof.* By the optimal condition of step 5 in Algorithm 4, we have, for  $j \in [m]$

$$\begin{aligned}
 0 &= (y_j^t - y_j^{t+1})^T (\partial g_j(y_j^{t+1}) - B_j^T z_t + \rho B_j^T (Ax_t + \sum_{i=1}^j B_i y_i^{t+1} + \sum_{i=j+1}^m B_i y_i^k - c) + H_j (y_j^{t+1} - y_j^t)) \\
 &\leq g_j(y_j^t) - g_j(y_j^{t+1}) - (z_t)^T (B_j y_j^t - B_j y_j^{t+1}) + \rho (B_j y_j^t - B_j y_j^{t+1})^T (Ax_t + \sum_{i=1}^j B_i y_i^{t+1} + \sum_{i=j+1}^m B_i y_i^k - c) - \|y_j^{t+1} - y_j^t\|_{H_j}^2 \\
 &= g_j(y_j^t) - g_j(y_j^{t+1}) - (z_t)^T (Ax_t + \sum_{i=1}^{j-1} B_i y_i^{t+1} + \sum_{i=j}^m B_i y_i^k - c) + (z_t)^T (Ax_t + \sum_{i=1}^j B_i y_i^{t+1} + \sum_{i=j+1}^m B_i y_i^k - c) \\
 &\quad + \frac{\rho}{2} \|Ax_t + \sum_{i=1}^{j-1} B_i y_i^{t+1} + \sum_{i=j}^m B_i y_i^k - c\|^2 - \frac{\rho}{2} \|Ax_t + \sum_{i=1}^j B_i y_i^{t+1} + \sum_{i=j+1}^m B_i y_i^k - c\|^2 - \frac{\rho}{2} \|B_j y_j^t - B_j y_j^{t+1}\|^2 - \|y_j^{t+1} - y_j^t\|_{H_j}^2 \\
 &= \underbrace{f(x_t) + \sum_{i=1}^{j-1} g_i(y_i^{t+1}) + \sum_{i=j}^m g_i(y_i^t) - (z_t)^T (Ax_t + \sum_{i=1}^{j-1} B_i y_i^{t+1} + \sum_{i=j}^m B_i y_i^k - c) + \frac{\rho}{2} \|Ax_t + \sum_{i=1}^{j-1} B_i y_i^{t+1} + \sum_{i=j}^m B_i y_i^k - c\|^2}_{\mathcal{L}_\rho(x_t, y_{[j-1]}^{t+1}, y_{[j:m]}^t, z_t)} \\
 &\quad - \underbrace{(f(x_t) + \sum_{i=1}^j g_i(y_i^{t+1}) + \sum_{i=j+1}^m g_i(y_i^t) - (z_t)^T (Ax_t + \sum_{i=1}^j B_i y_i^{t+1} + \sum_{i=j+1}^m B_i y_i^k - c) + \frac{\rho}{2} \|Ax_t + \sum_{i=1}^j B_i y_i^{t+1} + \sum_{i=j+1}^m B_i y_i^k - c\|^2)}_{\mathcal{L}_\rho(x_t, y_{[j]}^{t+1}, y_{[j+1:m]}^t, z_t)} \\
 &\quad - \frac{\rho}{2} \|B_j y_j^t - B_j y_j^{t+1}\|^2 - \|y_j^{t+1} - y_j^t\|_{H_j}^2 \\
 &\leq \mathcal{L}_\rho(x_t, y_{[j-1]}^{t+1}, y_{[j:m]}^t, z_t) - \mathcal{L}_\rho(x_t, y_{[j]}^{t+1}, y_{[j+1:m]}^t, z_t) - \sigma_{\min}(H_j) \|y_j^t - y_j^{t+1}\|^2, \tag{119}
 \end{aligned}$$

where the first inequality holds by the convexity of function  $g_j(y)$ , and the second equality follows by applying the equality  $(a-b)^T b = \frac{1}{2}(\|a\|^2 - \|b\|^2 - \|a-b\|^2)$  on the term  $(B_j y_j^t - B_j y_j^{t+1})^T (Ax_t + \sum_{i=1}^j B_i y_i^{t+1} + \sum_{i=j+1}^m B_i y_i^k - c)$ . Thus, we have, for all  $j \in [m]$

$$\mathcal{L}_\rho(x_t, y_{[j]}^{t+1}, y_{[j+1:m]}^t, z_t) \leq \mathcal{L}_\rho(x_t, y_{[j-1]}^{t+1}, y_{[j:m]}^t, z_t) - \sigma_{\min}(H_j) \|y_j^t - y_j^{t+1}\|^2. \tag{120}$$

Telescoping inequality (120) over  $j$  from 1 to  $m$ , we obtain

$$\mathcal{L}_\rho(x_t, y_{[m]}^{t+1}, z_t) \leq \mathcal{L}_\rho(x_t, y_{[m]}^t, z_t) - \sigma_{\min}^H \sum_{j=1}^m \|y_j^t - y_j^{t+1}\|^2. \tag{121}$$

where  $\sigma_{\min}^H = \min_{j \in [m]} \sigma_{\min}(H_j)$ .

Using Assumption 1, we have

$$0 \leq f(x_t) - f(x_{t+1}) + \nabla f(x_t)^T (x_{t+1} - x_t) + \frac{L}{2} \|x_{t+1} - x_t\|^2. \tag{122}$$

By the step 6 of Algorithm 4, we have

$$0 = (x_t - x_{t+1})^T (v_t - A^T z_t + \rho A^T (Ax_{t+1} + \sum_{j=1}^m B_j y_j^{t+1} - c) + \frac{G}{\eta} (x_{t+1} - x_t)). \tag{123}$$

Combining (122) and (123), we have

$$\begin{aligned}
 0 &\leq f(x_t) - f(x_{t+1}) + \nabla f(x_t)^T(x_{t+1} - x_t) + \frac{L}{2}\|x_{t+1} - x_t\|^2 \\
 &\quad + (x_t - x_{t+1})^T(v_t - A^T z_t + \rho A^T(Ax_{t+1} + \sum_{j=1}^m B_j y_j^{t+1} - c) + \frac{G}{\eta}(x_{t+1} - x_t)) \\
 &= f(x_t) - f(x_{t+1}) + \frac{L}{2}\|x_t - x_{t+1}\|^2 - \frac{1}{\eta}\|x_t - x_{t+1}\|_G^2 + (x_t - x_{t+1})^T(v_t - \nabla f(x_t)) \\
 &\quad - (z_t)^T(Ax_t - Ax_{t+1}) + \rho(Ax_t - Ax_{t+1})^T(Ax_t + \sum_{j=1}^m B_j y_j^{t+1} - c) \\
 &\stackrel{(i)}{=} f(x_t) - f(x_{t+1}) + \frac{L}{2}\|x_t - x_{t+1}\|^2 - \frac{1}{\eta}\|x_t - x_{t+1}\|_G^2 + (x_t - x_{t+1})^T(v_t - \nabla f(x_t)) - (z_t)^T(Ax_t + \sum_{j=1}^m B_j y_j^{t+1} - c) \\
 &\quad + (z_t)^T(Ax_{t+1} + \sum_{j=1}^m B_j y_j^{t+1} - c) + \frac{\rho}{2}(\|Ax_t + \sum_{j=1}^m B_j y_j^{t+1} - c\|^2 - \|Ax_{t+1} + \sum_{j=1}^m B_j y_j^{t+1} - c\|^2 - \|Ax_t - Ax_{t+1}\|^2) \\
 &= f(x_t) + \underbrace{\sum_{j=1}^m g_j(y_j^{t+1}) - (z_t)^T(Ax_t + \sum_{j=1}^m B_j y_j^{t+1} - c) + \frac{\rho}{2}\|Ax_t + \sum_{j=1}^m B_j y_j^{t+1} - c\|^2}_{\mathcal{L}_\rho(x_t, y_{[m]}^{t+1}, z_t)} \\
 &\quad - \underbrace{(f(x_{t+1}) + \sum_{j=1}^m g_j(y_j^{t+1}) - (z_t)^T(Ax_{t+1} + \sum_{j=1}^m B_j y_j^{t+1} - c) + \frac{\rho}{2}\|Ax_{t+1} + \sum_{j=1}^m B_j y_j^{t+1} - c\|^2)}_{\mathcal{L}_\rho(x_{t+1}, y_{[m]}^{t+1}, z_t)} \\
 &\quad + \frac{L}{2}\|x_t - x_{t+1}\|^2 + (x_t - x_{t+1})^T(v_t - \nabla f(x_t)) - \frac{1}{\eta}\|x_t - x_{t+1}\|_G^2 - \frac{\rho}{2}\|Ax_t - Ax_{t+1}\|^2 \\
 &\leq \mathcal{L}_\rho(x_t, y_{[m]}^{t+1}, z_t) - \mathcal{L}_\rho(x_{t+1}, y_{[m]}^{t+1}, z_t) - (\frac{\sigma_{\min}(G)}{\eta} + \frac{\rho\sigma_{\min}^A}{2} - \frac{L}{2})\|x_t - x_{t+1}\|^2 + (x_t - x_{t+1})^T(v_t - \nabla f(x_t)) \\
 &\stackrel{(ii)}{\leq} \mathcal{L}_\rho(x_t, y_{[m]}^{t+1}, z_t) - \mathcal{L}_\rho(x_{t+1}, y_{[m]}^{t+1}, z_t) - (\frac{\sigma_{\min}(G)}{\eta} + \frac{\rho\sigma_{\min}^A}{2} - L)\|x_t - x_{t+1}\|^2 + \frac{1}{2L}\|v_t - \nabla f(x_t)\|^2 \\
 &\stackrel{(iii)}{\leq} \mathcal{L}_\rho(x_t, y_{[m]}^{t+1}, z_t) - \mathcal{L}_\rho(x_{t+1}, y_{[m]}^{t+1}, z_t) - (\frac{\sigma_{\min}(G)}{\eta} + \frac{\rho\sigma_{\min}^A}{2} - L)\|x_t - x_{t+1}\|^2 + \frac{L}{2b} \frac{1}{n} \sum_{i=1}^n \|x_t - u_i^t\|^2, \quad (124)
 \end{aligned}$$

where the equality (i) holds by applying the equality  $(a - b)^T b = \frac{1}{2}(\|a\|^2 - \|b\|^2 - \|a - b\|^2)$  on the term  $(Ax_t - Ax_{t+1})^T(Ax_{t+1} + \sum_{j=1}^m B_j y_j^{t+1} - c)$ ; the inequality (ii) follows by the inequality  $a^T b \leq \frac{L}{2}\|a\|^2 + \frac{1}{2L}\|b\|^2$ , and the inequality (iii) holds by Lemma 4 of (Reddi et al., 2016). Thus, we obtain

$$\begin{aligned}
 \mathcal{L}_\rho(x_{t+1}, y_{[m]}^{t+1}, z_t) &\leq \mathcal{L}_\rho(x_t, y_{[m]}^{t+1}, z_t) - (\frac{\sigma_{\min}(G)}{\eta} + \frac{\rho\sigma_{\min}^A}{2} - L)\|x_t - x_{t+1}\|^2 \\
 &\quad + \frac{L}{2b} \frac{1}{n} \sum_{i=1}^n \|x_t - u_i^t\|^2. \quad (125)
 \end{aligned}$$

By the step 7 in Algorithm 4, we have

$$\begin{aligned}
 \mathcal{L}_\rho(x_{t+1}, y_{[m]}^{t+1}, z_{t+1}) - \mathcal{L}_\rho(x_{t+1}, y_{[m]}^{t+1}, z_t) &= \frac{1}{\rho}\|z_{t+1} - z_t\|^2 \\
 &\leq \frac{9L^2}{\sigma_{\min}^A \rho b n} \frac{1}{n} \sum_{i=1}^n (\|x_t - u_i^t\|^2 + \|x_{t-1} - u_i^{t-1}\|^2) + \frac{3\sigma_{\max}^2(G)}{\sigma_{\min}^A \eta^2 \rho} \|x_{t+1} - x_t\|^2 \\
 &\quad + \frac{3(\sigma_{\max}^2(G) + 3L^2 \eta^2)}{\sigma_{\min}^A \eta^2 \rho} \|x_t - x_{t-1}\|^2, \quad (126)
 \end{aligned}$$



where the first inequality follows by Lemma 8.

Combining (121), (125) and (126), we have

$$\begin{aligned}
 \mathcal{L}_\rho(x_{t+1}, y_{[m]}^{t+1}, z_{t+1}) &\leq \mathcal{L}_\rho(x_t, y_{[m]}^t, z_t) - \left(\frac{\sigma_{\min}(G)}{\eta} + \frac{\rho\sigma_{\min}^A}{2} - L\right)\|x_t - x_{t+1}\|^2 + \frac{L}{2b} \frac{1}{n} \sum_{i=1}^n \|x_t - u_i^t\|^2 \\
 &\quad - \sigma_{\min}^H \sum_{j=1}^m \|y_j^t - y_j^{t+1}\|^2 + \frac{9L^2}{\sigma_{\min}^A \rho b} \frac{1}{n} \sum_{i=1}^n (\|x_t - u_i^t\|^2 + \|x_{t-1} - u_i^{t-1}\|^2) \\
 &\quad + \frac{3\sigma_{\max}^2(G)}{\sigma_{\min}^A \eta^2 \rho} \|x_{t+1} - x_t\|^2 + \frac{3(\sigma_{\max}^2(G) + 3L^2\eta^2)}{\sigma_{\min}^A \eta^2 \rho} \|x_t - x_{t-1}\|^2.
 \end{aligned} \tag{127}$$

Next, we define a *Lyapunov* function  $\Omega_t$  as follows:

$$\Omega_t = \mathbb{E}[\mathcal{L}_\rho(x_t, y_{[m]}^t, z_t) + \left(\frac{3\sigma_{\max}^2(G)}{\sigma_{\min}^A \rho \eta^2} + \frac{9L^2}{\sigma_{\min}^A \rho}\right)\|x_t - x_{t-1}\|^2 + \frac{9L^2}{\sigma_{\min}^A \rho b} \frac{1}{n} \sum_{i=1}^n \|x_{t-1} - z_i^{t-1}\|^2 + \frac{c_t}{n} \sum_{i=1}^n \|x_t - z_i^t\|^2]. \tag{128}$$

By the step 9 of Algorithm 4, we have

$$\begin{aligned}
 \frac{1}{n} \sum_{i=1}^n \|x_{t+1} - u_i^{t+1}\|^2 &= \frac{1}{n} \sum_{i=1}^n (p\|x_{t+1} - x_t\|^2 + (1-p)\|x_{t+1} - u_i^t\|^2) \\
 &= \frac{p}{n} \sum_{i=1}^n \|x_{t+1} - x_t\|^2 + \frac{1-p}{n} \sum_{i=1}^n \|x_{t+1} - u_i^t\|^2 \\
 &= p\|x_{t+1} - x_t\|^2 + \frac{1-p}{n} \sum_{i=1}^n \|x_{t+1} - u_i^t\|^2,
 \end{aligned} \tag{129}$$

where  $p$  denotes probability of an index  $i$  being in  $\mathcal{I}_t$ . Here, we have

$$p = 1 - \left(1 - \frac{1}{n}\right)^b \geq 1 - \frac{1}{1 + b/n} = \frac{b/n}{1 + b/n} \geq \frac{b}{2n}, \tag{130}$$

where the first inequality follows from  $(1-a)^b \leq \frac{1}{1+ab}$ , and the second inequality holds by  $b \leq n$ . Considering the upper bound of  $\|x_{t+1} - z_i^t\|^2$ , we have

$$\begin{aligned}
 \|x_{t+1} - u_i^t\|^2 &= \|x_{t+1} - x_t + x_t - u_i^t\|^2 \\
 &= \|x_{t+1} - x_t\|^2 + 2(x_{t+1} - x_t)^T(x_t - u_i^t) + \|x_t - u_i^t\|^2 \\
 &\leq \|x_{t+1} - x_t\|^2 + 2\left(\frac{1}{2\beta}\|x_{t+1} - x_t\|^2 + \frac{\beta}{2}\|x_t - u_i^t\|^2\right) + \|x_t - u_i^t\|^2 \\
 &= \left(1 + \frac{1}{\beta}\right)\|x_{t+1} - x_t\|^2 + (1 + \beta)\|x_t - u_i^t\|^2,
 \end{aligned} \tag{131}$$

where  $\beta > 0$ . Combining (129) with (131), we have

$$\frac{1}{n} \sum_{i=1}^n \|x_{t+1} - u_i^{t+1}\|^2 \leq \left(1 + \frac{1-p}{\beta}\right)\|x_{t+1} - x_t\|^2 + \frac{(1-p)(1+\beta)}{n} \sum_{i=1}^n \|x_t - u_i^t\|^2. \tag{132}$$

It follows that

$$\begin{aligned}
 \Omega_{t+1} &= \mathbb{E}[\mathcal{L}_\rho(x_{t+1}, y_{[m]}^{t+1}, z_{t+1}) + (\frac{3\sigma_{\max}^2(G)}{\sigma_{\min}^A \rho \eta^2} + \frac{9L^2}{\sigma_{\min}^A \rho}) \|x_{t+1} - x_t\|^2 + \frac{9L^2}{\sigma_{\min}^A \rho b} \frac{1}{n} \sum_{i=1}^n \|x_t - u_i^t\|^2 + \frac{c_{t+1}}{n} \sum_{i=1}^n \|x_{t+1} - u_i^{t+1}\|^2] \\
 &\leq \mathcal{L}_\rho(x_t, y_{[m]}^t, z_t) + (\frac{3\sigma_{\max}^2(G)}{\sigma_{\min}^A \rho \eta^2} + \frac{9L^2}{\sigma_{\min}^A \rho}) \|x_t - x_{t-1}\|^2 + \frac{9L^2}{\sigma_{\min}^A \rho b} \frac{1}{n} \sum_{i=1}^n \|x_{t-1} - u_i^{t-1}\|^2 \\
 &\quad + (\frac{18L^2}{\sigma_{\min}^A \rho b} + \frac{L}{b} + (1-p)(1+\beta)c_{t+1}) \frac{1}{n} \sum_{i=1}^n \|x_t - u_i^t\|^2 - \sigma_{\min}^H \sum_{j=1}^m \|y_j^t - y_j^{t+1}\|^2 \\
 &\quad - \frac{L}{2b} \frac{1}{n} \sum_{i=1}^n \|x_t - u_i^t\|^2 - (\frac{\sigma_{\min}(G)}{\eta} + \frac{\rho\sigma_{\min}^A}{2} - L - \frac{6\sigma_{\max}^2(G)}{\sigma_{\min}^A \eta^2 \rho} - \frac{9L^2}{\sigma_{\min}^A \rho} - (1 + \frac{1-p}{\beta})c_{t+1}) \|x_t - x_{t+1}\|^2 \\
 &= \Omega_t - \sigma_{\min}^H \sum_{j=1}^m \|y_j^t - y_j^{t+1}\|^2 - \chi_t \|x_t - x_{t+1}\|^2 - \frac{L}{2b} \frac{1}{n} \sum_{i=1}^n \|x_t - u_i^t\|^2, \tag{133}
 \end{aligned}$$

where  $c_t = \frac{18L^2}{\sigma_{\min}^A \rho b} + \frac{L}{b} + (1-p)(1+\beta)c_{t+1}$  and  $\chi_t = \frac{\sigma_{\min}(G)}{\eta} + \frac{\rho\sigma_{\min}^A}{2} - L - \frac{6\sigma_{\max}^2(G)}{\sigma_{\min}^A \eta^2 \rho} - \frac{9L^2}{\sigma_{\min}^A \rho} - (1 + \frac{1-p}{\beta})c_{t+1}$ .

Let  $c_T = 0$  and  $\beta = \frac{b}{4n}$ . Since  $(1-p)(1+\beta) = 1 + \beta - p - p\beta \leq 1 + \beta - p$  and  $p \geq \frac{b}{2n}$ , it follows that

$$c_t \leq c_{t+1}(1-\theta) + \frac{18L^2}{\sigma_{\min}^A \rho b} + \frac{L}{b}, \tag{134}$$

where  $\theta = p - \beta \geq \frac{b}{4n}$ . Then recursing on  $t$ , for  $0 \leq t \leq T-1$ , we have

$$c_t \leq \frac{1}{b} (\frac{18L^2}{\sigma_{\min}^A \rho} + L) \frac{1-\theta^{T-t}}{\theta} \leq \frac{1}{b\theta} (\frac{18L^2}{\sigma_{\min}^A \rho} + L) \leq \frac{4n}{b^2} (\frac{18L^2}{\sigma_{\min}^A \rho} + L). \tag{135}$$

It follows that

$$\begin{aligned}
 \chi_t &= \frac{\sigma_{\min}(G)}{\eta} + \frac{\rho\sigma_{\min}^A}{2} - L - \frac{6\sigma_{\max}^2(G)}{\sigma_{\min}^A \eta^2 \rho} - \frac{9L^2}{\sigma_{\min}^A \rho} - (1 + \frac{1-p}{\beta})c_{t+1} \\
 &\geq \frac{\sigma_{\min}(G)}{\eta} + \frac{\rho\sigma_{\min}^A}{2} - L - \frac{6\sigma_{\max}^2(G)}{\sigma_{\min}^A \eta^2 \rho} - \frac{9L^2}{\sigma_{\min}^A \rho} - (1 + \frac{4n-2b}{b}) \frac{4n}{b^2} (\frac{18L^2}{\sigma_{\min}^A \rho} + L) \\
 &= \frac{\sigma_{\min}(G)}{\eta} + \frac{\rho\sigma_{\min}^A}{2} - L - \frac{6\sigma_{\max}^2(G)}{\sigma_{\min}^A \eta^2 \rho} - \frac{9L^2}{\sigma_{\min}^A \rho} - (\frac{4n}{b} - 1) \frac{4n}{b^2} (\frac{18L^2}{\sigma_{\min}^A \rho} + L) \\
 &\geq \frac{\sigma_{\min}(G)}{\eta} + \frac{\rho\sigma_{\min}^A}{2} - L - \frac{6\sigma_{\max}^2(G)}{\sigma_{\min}^A \eta^2 \rho} - \frac{9L^2}{\sigma_{\min}^A \rho} - \frac{16n^2}{b^3} (\frac{18L^2}{\sigma_{\min}^A \rho} + L) \\
 &= \underbrace{\frac{\sigma_{\min}(G)}{\eta} - L - \frac{16n^2L}{b^3}}_{Q_1} + \underbrace{\frac{\rho\sigma_{\min}^A}{2} - \frac{6\sigma_{\max}^2(G)}{\sigma_{\min}^A \eta^2 \rho} - \frac{9L^2}{\sigma_{\min}^A \rho} - \frac{288n^2L^2}{\sigma_{\min}^A \rho b^3}}_{Q_2} \tag{136}
 \end{aligned}$$

Let  $b = \lceil n^{\frac{2}{3}} \rceil$  and  $0 < \eta \leq \frac{\sigma_{\min}(G)}{17L}$ , we have  $Q_1 \geq 0$ . Further, let  $\eta = \frac{\alpha\sigma_{\min}(G)}{17L}$  ( $0 < \alpha \leq 1$ ) and  $\rho = \frac{2\sqrt{2031}\kappa_G L}{\sigma_{\min}^A \alpha}$ , we have

$$\begin{aligned}
 Q_2 &= \frac{\rho\sigma_{\min}^A}{2} - \frac{6\sigma_{\max}^2(G)}{\sigma_{\min}^A \eta^2 \rho} - \frac{9L^2}{\sigma_{\min}^A \rho} - \frac{288n^2L^2}{\sigma_{\min}^A \rho b^3} \\
 &= \frac{\rho\sigma_{\min}^A}{2} - \frac{1734\kappa_G^2 L^2}{\sigma_{\min}^A \alpha^2 \rho} - \frac{9L^2}{\sigma_{\min}^A \rho} - \frac{288L^2}{\sigma_{\min}^A \rho} \\
 &\geq \frac{\rho\sigma_{\min}^A}{4} + \underbrace{\frac{\rho\sigma_{\min}^A}{4} - \frac{2031\kappa_G^2 L^2}{\sigma_{\min}^A \alpha^2 \rho}}_{\geq 0} \\
 &\geq \frac{\sqrt{2031}\kappa_G L}{2\alpha}, \tag{137}
 \end{aligned}$$

where  $\kappa_G \geq 1$ . Thus, we have  $\chi_t \geq \frac{\sqrt{2031}\kappa_G L}{2\alpha}$  for all  $t$ .

Since  $\frac{L}{2b} > 0$  and  $\chi_t > 0$ , by (133), the function  $\Omega_t$  is monotone decreasing. By the definition of function  $\Omega_t$ , we have

$$\begin{aligned}
 \Omega_t &\geq \mathbb{E}[\mathcal{L}_\rho(x_t, y_{[m]}^t, z_t)] \\
 &= f(x_t) + \sum_{j=1}^m g_j(y_j^t) - (z_t)^T (Ax_t + \sum_{j=1}^m B_j y_j^t - c) + \frac{\rho}{2} \|Ax_t + \sum_{j=1}^m B_j y_j^t - c\|^2 \\
 &= f(x_t) + \sum_{j=1}^m g_j(y_j^t) - \frac{1}{\rho} (z_t)^T (z_{t-1} - z_t) + \frac{1}{2\rho} \|z_t - z_{t-1}\|^2 \\
 &= f(x_t) + \sum_{j=1}^m g_j(y_j^t) - \frac{1}{2\rho} \|z_{t-1}\|^2 + \frac{1}{2\rho} \|z_t\|^2 + \frac{1}{\rho} \|z_t - z_{t-1}\|^2 \\
 &\geq f^* + \sum_{j=1}^m g_j^* - \frac{1}{2\rho} \|z_{t-1}\|^2 + \frac{1}{2\rho} \|z_t\|^2.
 \end{aligned} \tag{138}$$

Summing the inequality (138) over  $t = 0, 1, \dots, T$ , we have

$$\frac{1}{T} \sum_{t=0}^T \Omega_t \geq f^* + \sum_{j=1}^m g_j^* - \frac{1}{2\rho} \|z_0\|^2. \tag{139}$$

Thus, the function  $\Omega_t$  is bounded from below. Let  $\Omega^*$  denote a lower bound of  $\Omega_t$ .

Finally, telescoping inequality (133) over  $t$  from 0 to  $T$ , we have

$$\frac{1}{T} \sum_{t=1}^T (\sigma_{\min}^H \sum_{j=1}^m \|y_j^t - y_j^{t+1}\|^2 + \chi_t \|x_t - x_{t+1}\|^2 + \frac{L}{2b} \frac{1}{n} \sum_{i=1}^n \|x_t - u_i^t\|^2) \leq \frac{\Omega_0 - \Omega^*}{T}, \tag{140}$$

where  $\chi_t \geq \frac{\sqrt{2031}\kappa_G L}{2\alpha} > 0$ . □

**Theorem 4.** Suppose the sequence  $\{x_t, y_{[m]}^t, z_t\}_{t=1}^T$  is generated from Algorithm 4, and let  $b = \lceil n^{\frac{2}{3}} \rceil$ ,  $\eta = \frac{\alpha \sigma_{\min}(G)}{17L}$  ( $0 < \alpha \leq 1$ ),  $\rho = \frac{2\sqrt{2031}\kappa_G}{\sigma_{\min}^A \alpha}$  and

$$\begin{aligned}
 \nu_1 &= m(\rho^2 \sigma_{\max}^B \sigma_{\max}^A + \rho^2 (\sigma_{\max}^B)^2 + \sigma_{\max}^2(H)), \quad \nu_2 = 3L^2 + \frac{3\sigma_{\max}^2(G)}{\eta^2} \\
 \nu_3 &= \frac{9L^2}{\sigma_{\min}^A \rho^2} + \frac{3\sigma_{\max}^2(G)}{\sigma_{\min}^A \eta^2 \rho^2},
 \end{aligned}$$

then we have

$$\min_{1 \leq t \leq T} \mathbb{E}[\text{dist}(0, \partial L(x_t, y_{[m]}^t, z_t))]^2 \leq \frac{\nu_{\max}}{T} \sum_{t=1}^T \theta_t \leq \frac{2\nu_{\max}(\Omega_0 - \Omega^*)}{\gamma T}$$

where  $\gamma = \min(\sigma_{\min}^H, L/2, \chi_t)$  with  $\chi_t \geq \frac{\sqrt{2031}\kappa_G L}{2\alpha} > 0$ ,  $\nu_{\max} = \max(\nu_1, \nu_2, \nu_3)$  and  $\Omega^*$  is a lower bound of function  $\Omega_t$ . It implies that the iteration number  $T$  satisfies

$$T = \frac{2\nu_{\max}}{\epsilon \gamma} (\Omega_0 - \Omega^*),$$

then  $(x_{t^*}, y_{[m]}^{t^*}, z_{t^*})$  is an  $\epsilon$ -approximate stationary point of (1), where  $t^* = \arg \min_{1 \leq t \leq T} \theta_t$ .

*Proof.* We first define an useful variable  $\theta_t = \mathbb{E}[\|x_{t+1} - x_t\|^2 + \|x_t - x_{t-1}\|^2 + \frac{1}{bn} \sum_{i=1}^n (\|x_t - u_i^t\|^2 + \|x_{t-1} - u_i^{t-1}\|^2) + \sum_{j=1}^m \|y_j^t - y_j^{t+1}\|^2]$ . By the optimal condition of the step 5 in Algorithm 4, we have, for all  $j \in [m]$

$$\begin{aligned}
 \mathbb{E}[\text{dist}(0, \partial_{y_j} L(x, y_{[m]}, z))]_{t+1} &= \mathbb{E}[\text{dist}(0, \partial g_j(y_j^{t+1}) - B_j^T z_{t+1})^2] \\
 &= \|B_j^T z_t - \rho B_j^T (Ax_t + \sum_{i=1}^j B_i y_i^{t+1} + \sum_{i=j+1}^m B_i y_i^t - c) - H_j(y_j^{t+1} - y_j^k) - B_j^T z_{t+1}\|^2 \\
 &= \|\rho B_j^T A(x_{t+1} - x_t) + \rho B_j^T \sum_{i=j+1}^m B_i (y_i^{t+1} - y_i^t) - H_j(y_j^{t+1} - y_j^k)\|^2 \\
 &\leq m\rho^2 \sigma_{\max}^{B_j} \sigma_{\max}^A \|x_{t+1} - x_t\|^2 + m\rho^2 \sigma_{\max}^{B_j} \sum_{i=j+1}^m \sigma_{\max}^{B_i} \|y_i^{t+1} - y_i^t\|^2 + m\sigma_{\max}^2(H_j) \|y_j^{t+1} - y_j^k\|^2 \\
 &\leq m(\rho^2 \sigma_{\max}^{B_j} \sigma_{\max}^A + \rho^2 (\sigma_{\max}^{B_j})^2 + \sigma_{\max}^2(H_j)) \theta_t, \tag{141}
 \end{aligned}$$

where the first inequality follows by the inequality  $\|\sum_{i=1}^r \alpha_i\|^2 \leq r \sum_{i=1}^r \|\alpha_i\|^2$ .

By the step 6 in Algorithm 4, we have

$$\begin{aligned}
 \mathbb{E}[\text{dist}(0, \nabla_x L(x, y_{[m]}, z))]_{t+1} &= \mathbb{E}\|A^T z_{t+1} - \nabla f(x_{t+1})\|^2 \\
 &= \mathbb{E}\|v_t - \nabla f(x_{t+1}) - \frac{G}{\eta}(x_t - x_{t+1})\|^2 \\
 &= \mathbb{E}\|v_t - \nabla f(x_t) + \nabla f(x_t) - \nabla f(x_{t+1}) - \frac{G}{\eta}(x_t - x_{t+1})\|^2 \\
 &\leq \frac{3L^2}{bn} \sum_{i=1}^n \|x_t - u_i^t\|^2 + 3(L^2 + \frac{\sigma_{\max}^2(G)}{\eta^2}) \|x_t - x_{t+1}\|^2 \\
 &\leq (3L^2 + \frac{3\sigma_{\max}^2(G)}{\eta^2}) \theta_t. \tag{142}
 \end{aligned}$$

By the step 7 of Algorithm 4, we have

$$\begin{aligned}
 \mathbb{E}[\text{dist}(0, \nabla_z L(x, y_{[m]}, z))]_{t+1} &= \mathbb{E}\|Ax_{t+1} + By_{t+1} - c\|^2 \\
 &= \frac{1}{\rho^2} \mathbb{E}\|z_{t+1} - z_t\|^2 \\
 &\leq \frac{9L^2}{\sigma_{\min}^A \rho^2 b n} \sum_{i=1}^n (\|x_t - u_i^t\|^2 + \|x_{t-1} - u_i^{t-1}\|^2) + \frac{3\sigma_{\max}^2(G)}{\sigma_{\min}^A \eta^2 \rho^2} \|x_{t+1} - x_t\|^2 \\
 &\quad + (\frac{3\sigma_{\max}^2(G)}{\sigma_{\min}^A \eta^2 \rho^2} + \frac{9L^2}{\sigma_{\min}^A \rho^2}) \|x_t - x_{t-1}\|^2 \\
 &\leq (\frac{9L^2}{\sigma_{\min}^A \rho^2} + \frac{3\sigma_{\max}^2(G)}{\sigma_{\min}^A \eta^2 \rho^2}) \theta_t. \tag{143}
 \end{aligned}$$

Let

$$\nu_1 = m(\rho^2 \sigma_{\max}^{B_j} \sigma_{\max}^A + \rho^2 (\sigma_{\max}^{B_j})^2 + \sigma_{\max}^2(H_j)), \quad \nu_2 = 6L^2 + \frac{3\sigma_{\max}^2(G)}{\eta^2}, \quad \nu_3 = \frac{9L^2}{\sigma_{\min}^A \rho^2} + \frac{3\sigma_{\max}^2(G)}{\sigma_{\min}^A \eta^2 \rho^2}.$$

Using (140), (141), (142) and (143), we have

$$\min_{1 \leq t \leq T} \mathbb{E}[\text{dist}(0, \partial L(x_t, y_{[m]}, z_t))]^2 \leq \frac{\nu_{\max}}{T} \sum_{t=1}^T \theta_t \leq \frac{2\nu_{\max}(\Omega_0 - \Omega^*)}{\gamma T}, \tag{144}$$

where  $\gamma = \min(\sigma_{\min}^H, \frac{L}{2}, \chi_t)$  and  $\nu_{\max} = \max(\nu_1, \nu_2, \nu_3)$ .

Given  $\eta = \frac{\alpha\sigma_{\min}(G)}{17L}$  ( $0 < \alpha \leq 1$ ) and  $\rho = \frac{2\sqrt{2031}\kappa_G}{\sigma_{\min}^A \alpha}$ , since  $m$  is relatively small, it easy verifies that  $\gamma = O(1)$  and  $\nu_{\max} = O(1)$ , which are independent on  $n$  and  $T$ . Thus, we obtain

$$\min_{1 \leq t \leq T} \mathbb{E} [\text{dist}(0, \partial L(x_t, y_{[m]}^t, z_t))^2] \leq O\left(\frac{1}{T}\right). \quad (145)$$

□

## References

- Fang, C., Li, C. J., Lin, Z., and Zhang, T. Spider: Near-optimal non-convex optimization via stochastic path integrated differential estimator. *arXiv preprint arXiv:1807.01695*, 2018.
- Huang, F., Chen, S., and Lu, Z. Stochastic alternating direction method of multipliers with variance reduction for nonconvex optimization. *arXiv preprint arXiv:1610.02758*, 2016.
- Reddi, S., Sra, S., Póczos, B., and Smola, A. J. Proximal stochastic methods for nonsmooth nonconvex finite-sum optimization. In *Advances in Neural Information Processing Systems*, pp. 1145–1153, 2016.
- Zheng, S. and Kwok, J. T. Stochastic variance-reduced admm. *arXiv preprint arXiv:1604.07070*, 2016.
